# Supplementary material for: Catalysis-free synthesis of thiazolidine–thiourea ligands for metal coordination (Au and Ag) and preliminary cytotoxic studies
Source: Royal Society of Chemistry journal article supplement (doi:10.1039/d3dt00079f), 2023-01-01

# **Free-Catalysed Synthesis of Thiazolidine-Thiourea Ligands for Metal Coordination (Au and Ag) and Preliminary Cytotoxic Studies**

Daniel Salvador,<sup>a</sup> Raquel P. Herrera<sup>b</sup> and M. Concepción Gimeno<sup>a,\*</sup>

<sup>a</sup> *Departamento de Química Inorgánica, Instituto de Síntesis Química y Catálisis Homogénea (ISQCH), CSIC-Universidad de Zaragoza, 50009 Zaragoza, Spain.*

<sup>b</sup> *Departamento de Química Orgánica, Instituto de Síntesis Química y Catálisis Homogénea (ISQCH), CSIC-Universidad de Zaragoza, 50009 Zaragoza, Spain. [gimeno@unizar.es](mailto:gimeno@unizar.es)*

# 1. NMR spectra of 2-amino-2-thiazolines and 2-iminothiazolidines

Figure S1.  $^1\text{H}$  NMR (300 MHz,  $\text{CDCl}_3$ ) spectrum of compound 4.

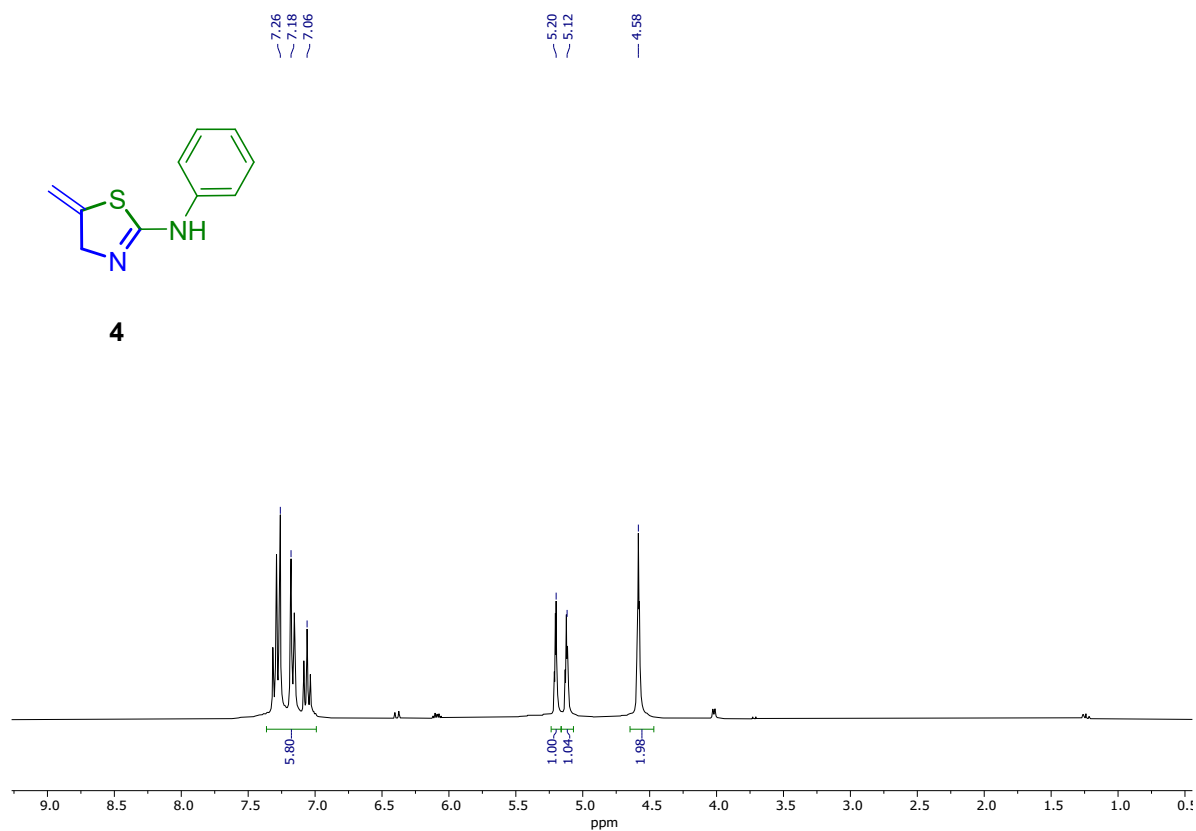

Figure S2.  $^{13}\text{C}\{^1\text{H}\}$  APT NMR (101 MHz,  $\text{CDCl}_3$ ) spectrum of compound 4.

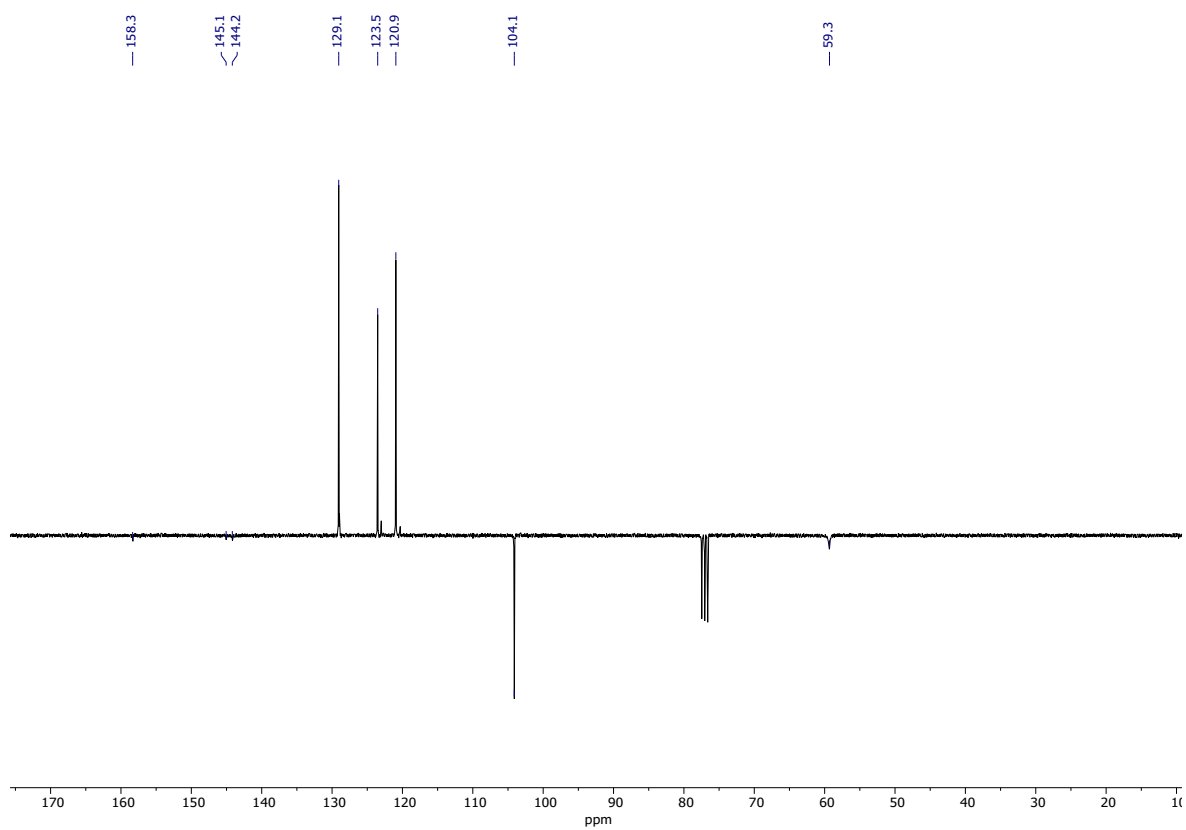

**Figure S3.**  $^1\text{H}$  NMR (400 MHz,  $\text{CDCl}_3$ ) spectrum of compound **5**.

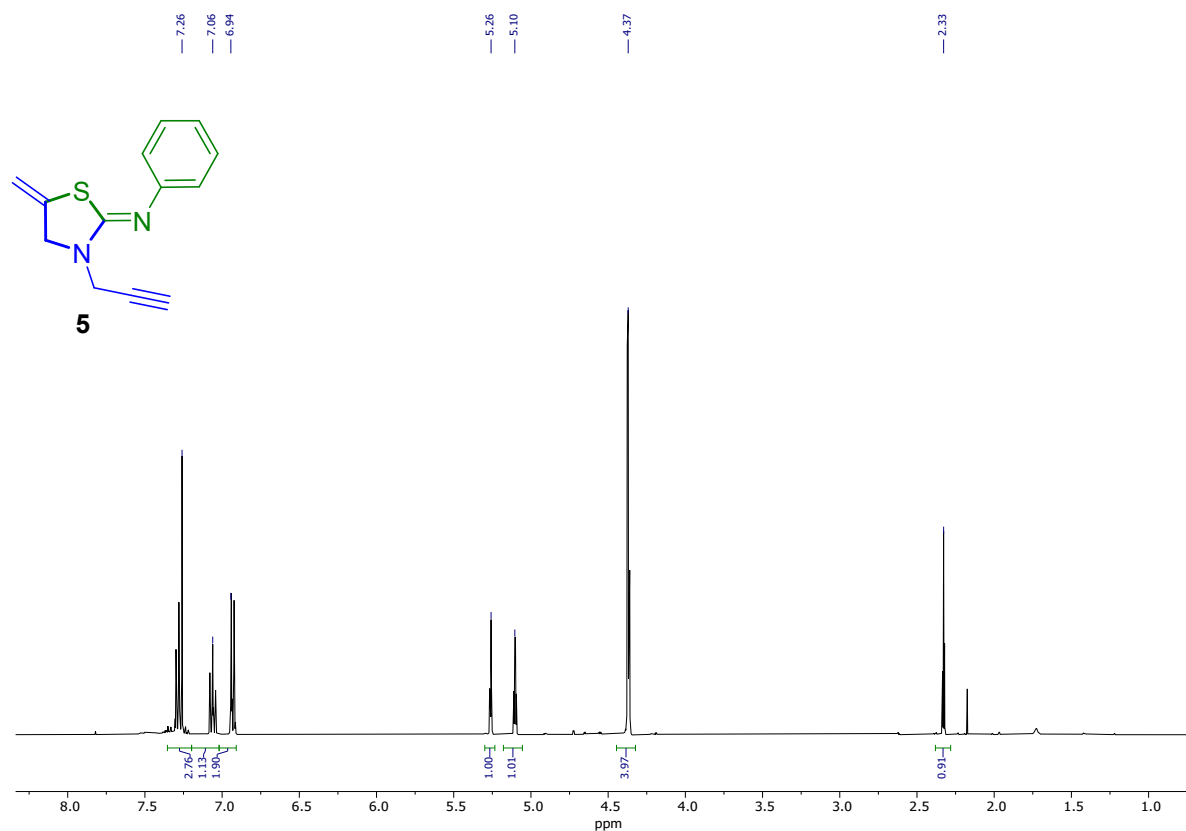

**Figure S4.**  $^{13}\text{C}\{^1\text{H}\}$  APT NMR (101 MHz,  $\text{CDCl}_3$ ) spectrum of compound **5**.

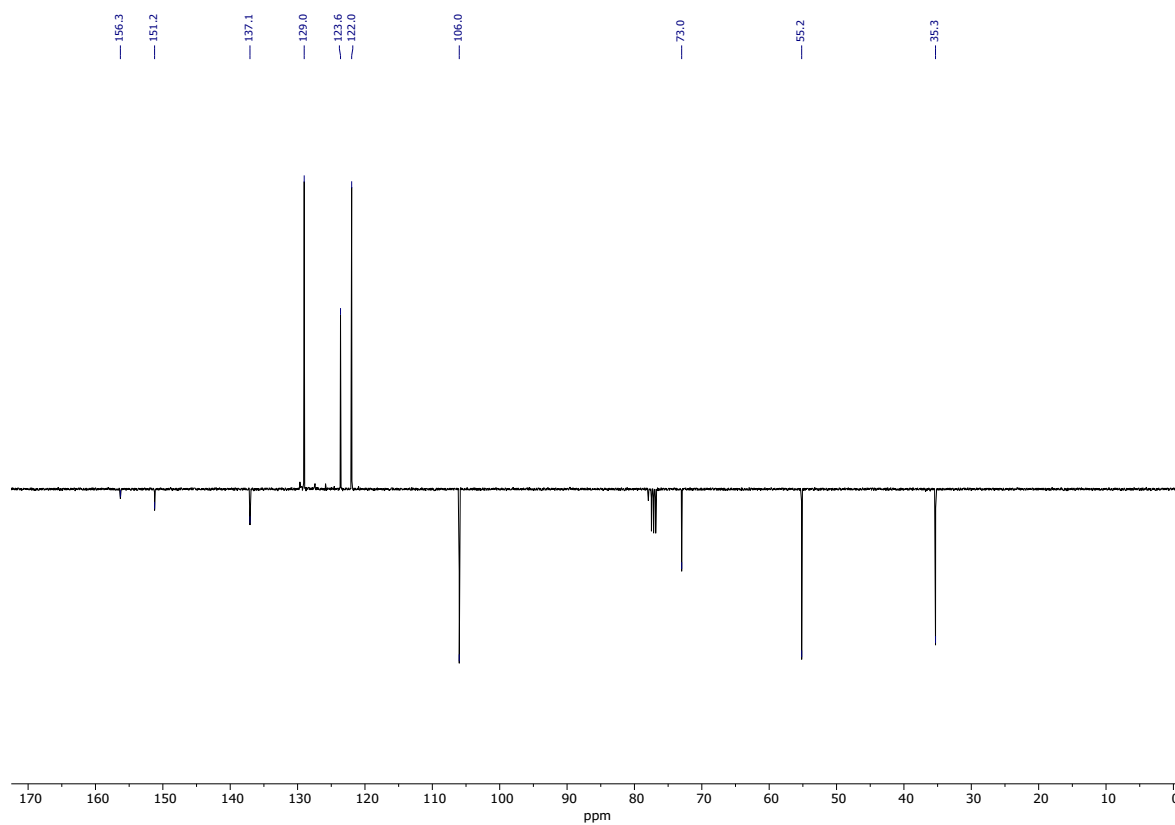

**Figure S5.**  $^1\text{H}$  NMR (400 MHz,  $\text{CDCl}_3$ ) spectrum of compound **6**.

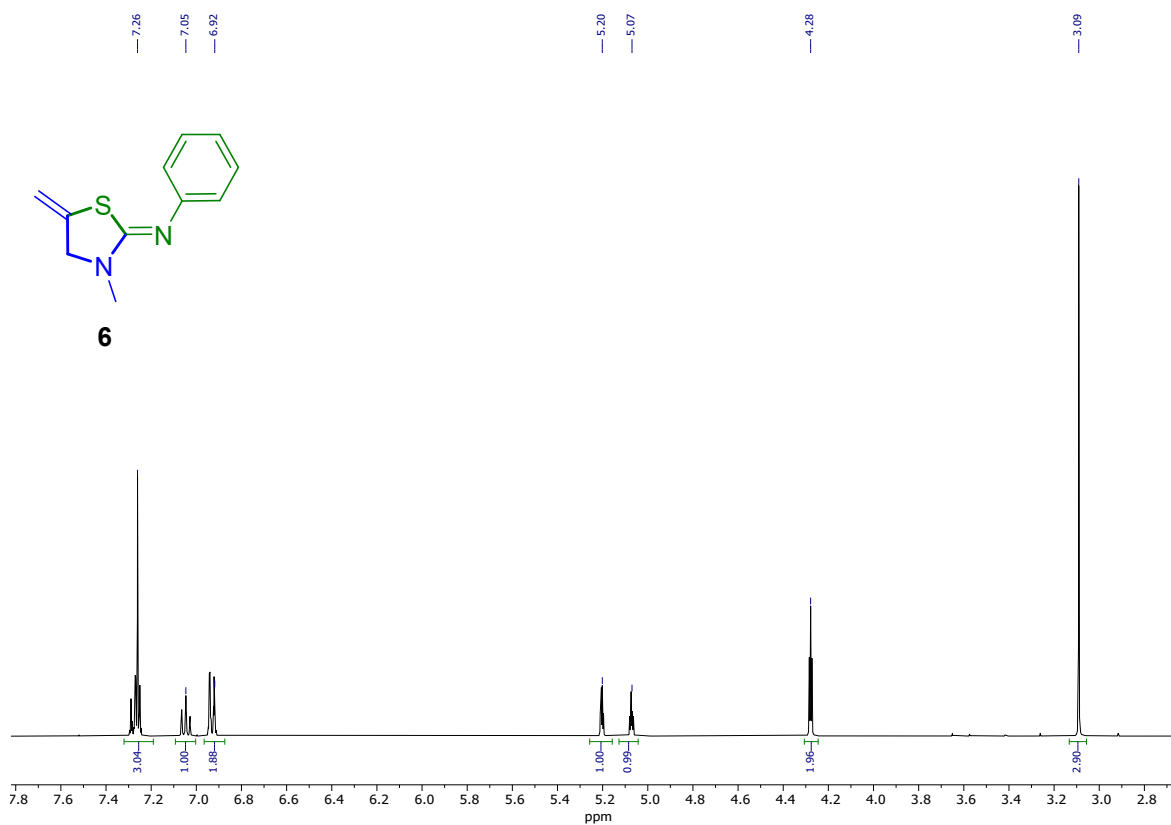

**Figure S6.**  $^{13}\text{C}\{^1\text{H}\}$  APT NMR (101 MHz,  $\text{CDCl}_3$ ) spectrum of compound **6**.

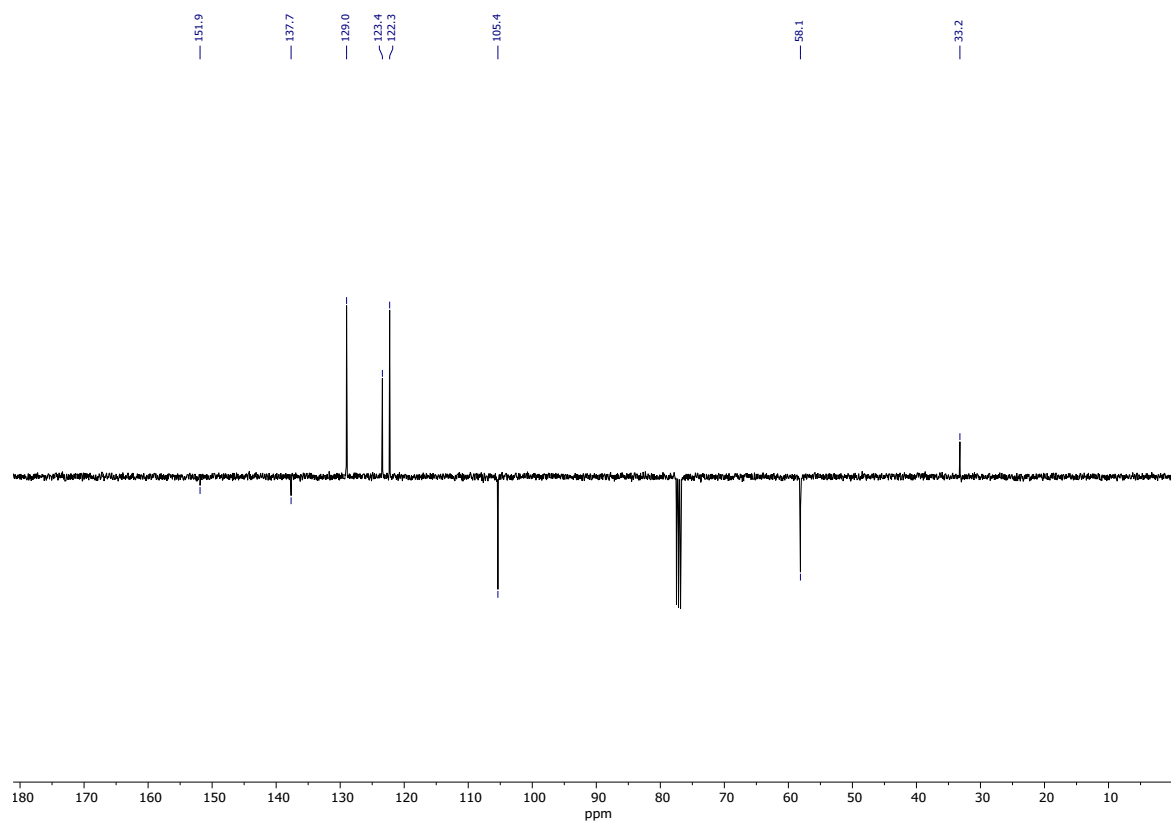

**Figure S7.**  $^1\text{H}$  NMR (400 MHz,  $\text{CDCl}_3$ ) spectrum of compound **7**.

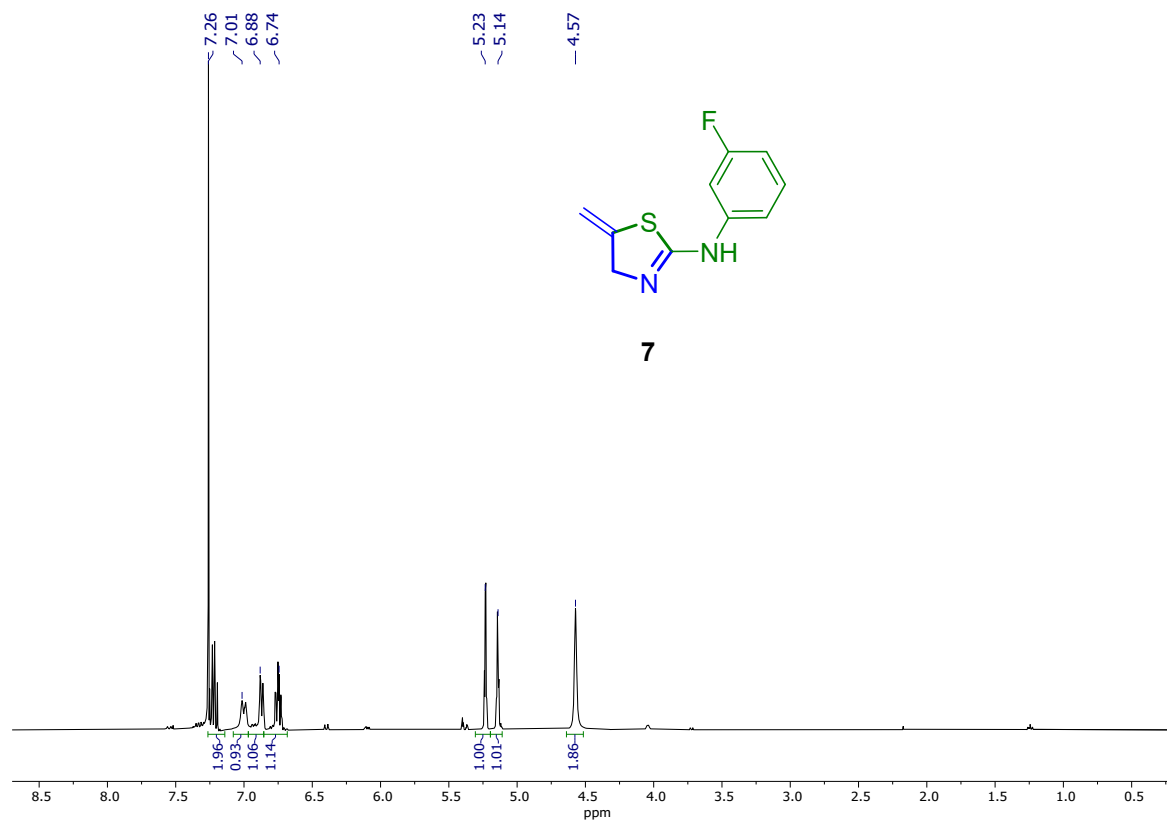

**Figure S8.**  $^{13}\text{C}\{^1\text{H}\}$  APT NMR (101 MHz,  $\text{CDCl}_3$ ) spectrum of compound **7**.

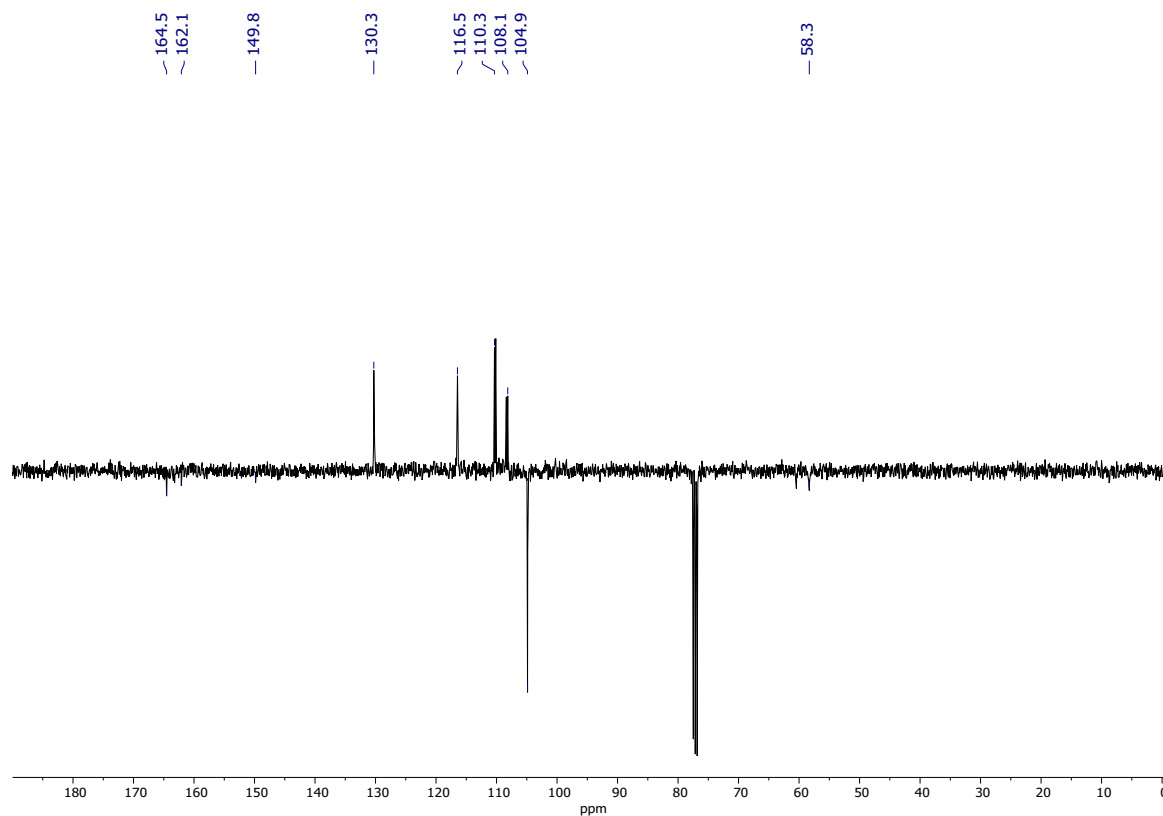

**Figure S9.**  $^{19}\text{F}$  NMR (376 MHz,  $\text{CDCl}_3$ ) spectrum of compound **7**.

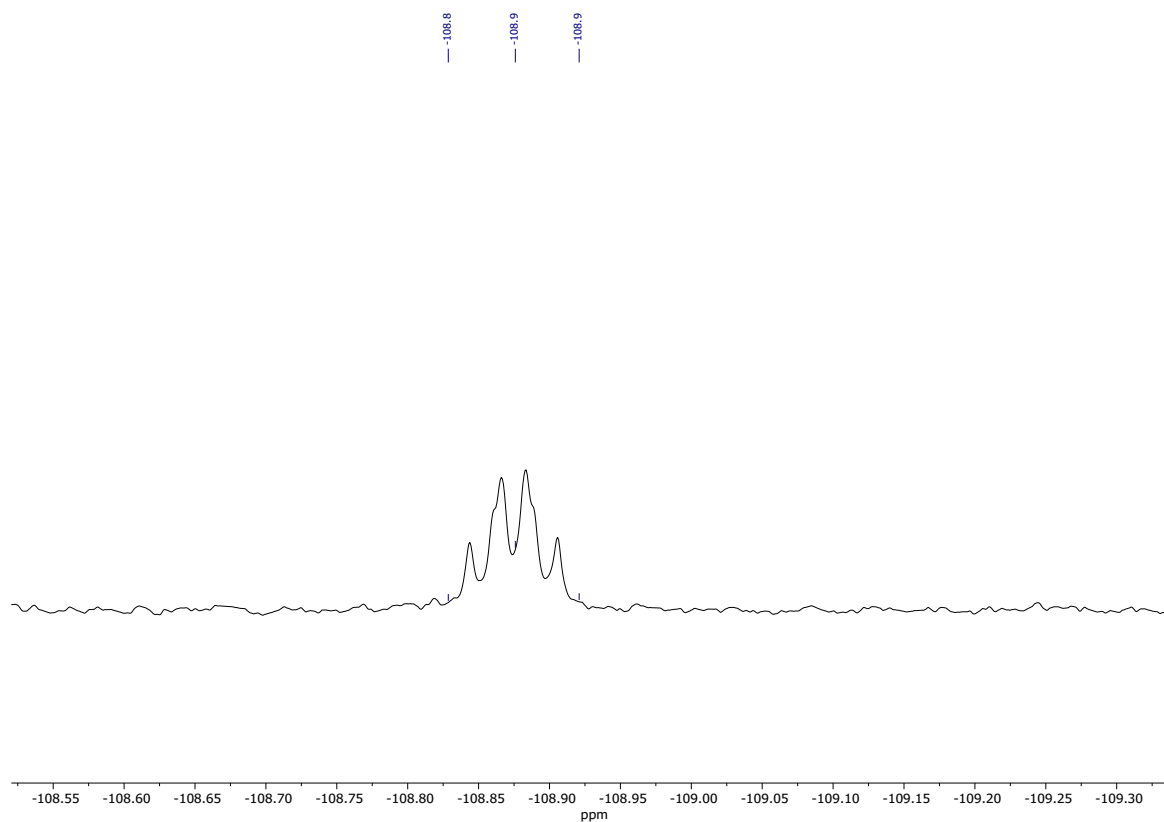

**Figure S10.**  $^1\text{H}$  NMR (400 MHz,  $\text{CDCl}_3$ ) spectrum of compound **8**.

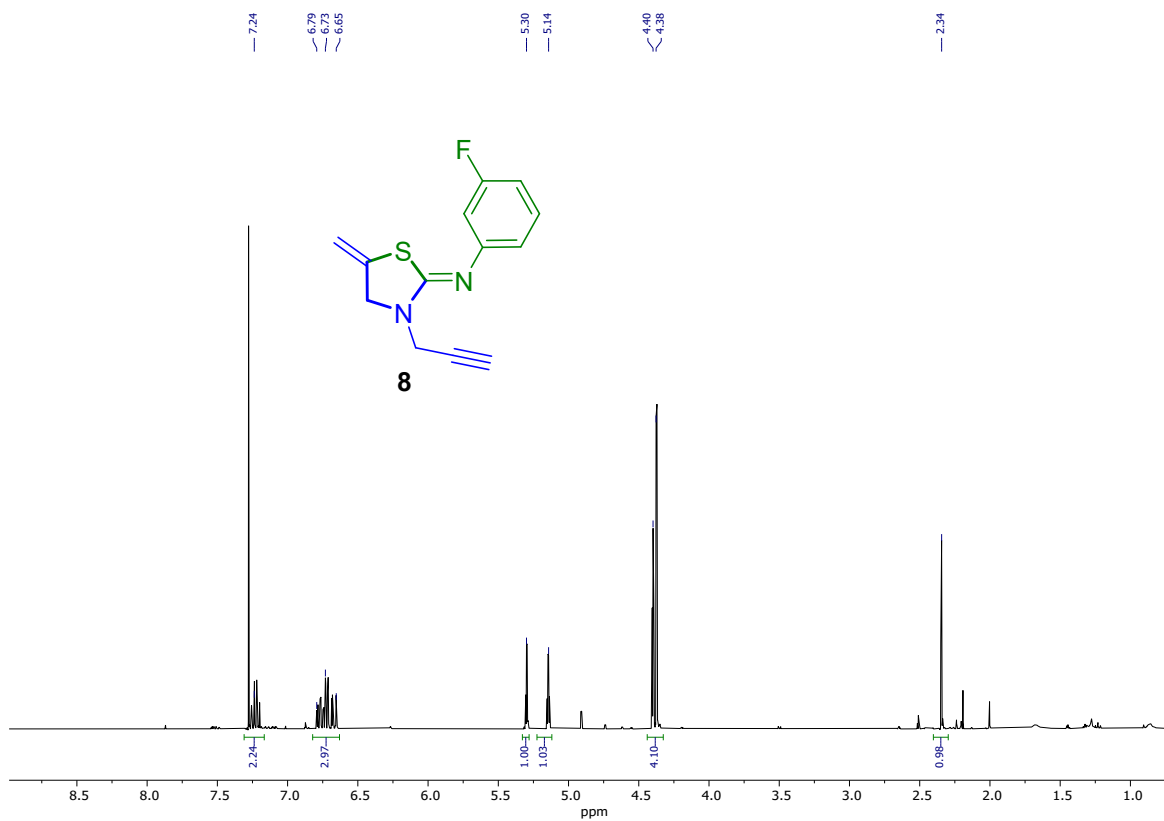

**Figure S11.**  $^{13}\text{C}\{^1\text{H}\}$  APT NMR (101 MHz,  $\text{CDCl}_3$ ) spectrum of compound **8**.

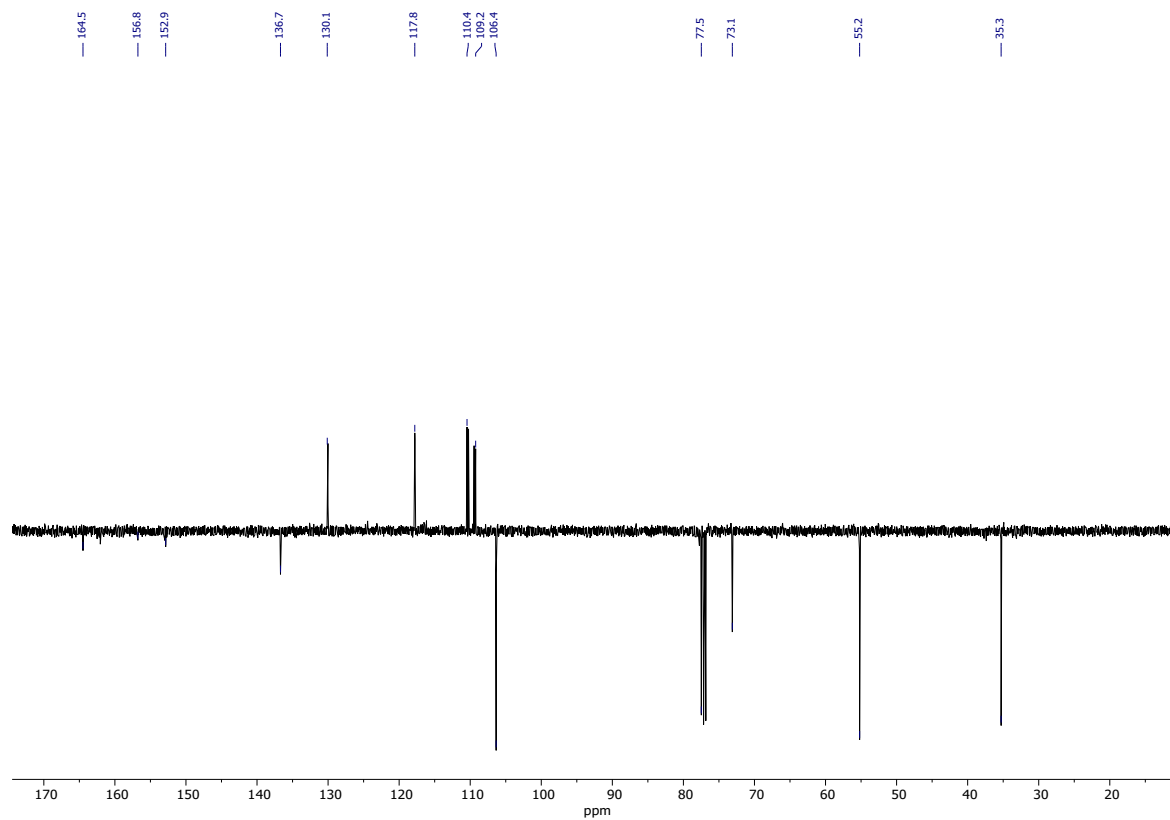

**Figure S12.**  $^{19}\text{F}$  NMR (376 MHz,  $\text{CDCl}_3$ ) spectrum of compound **8**.

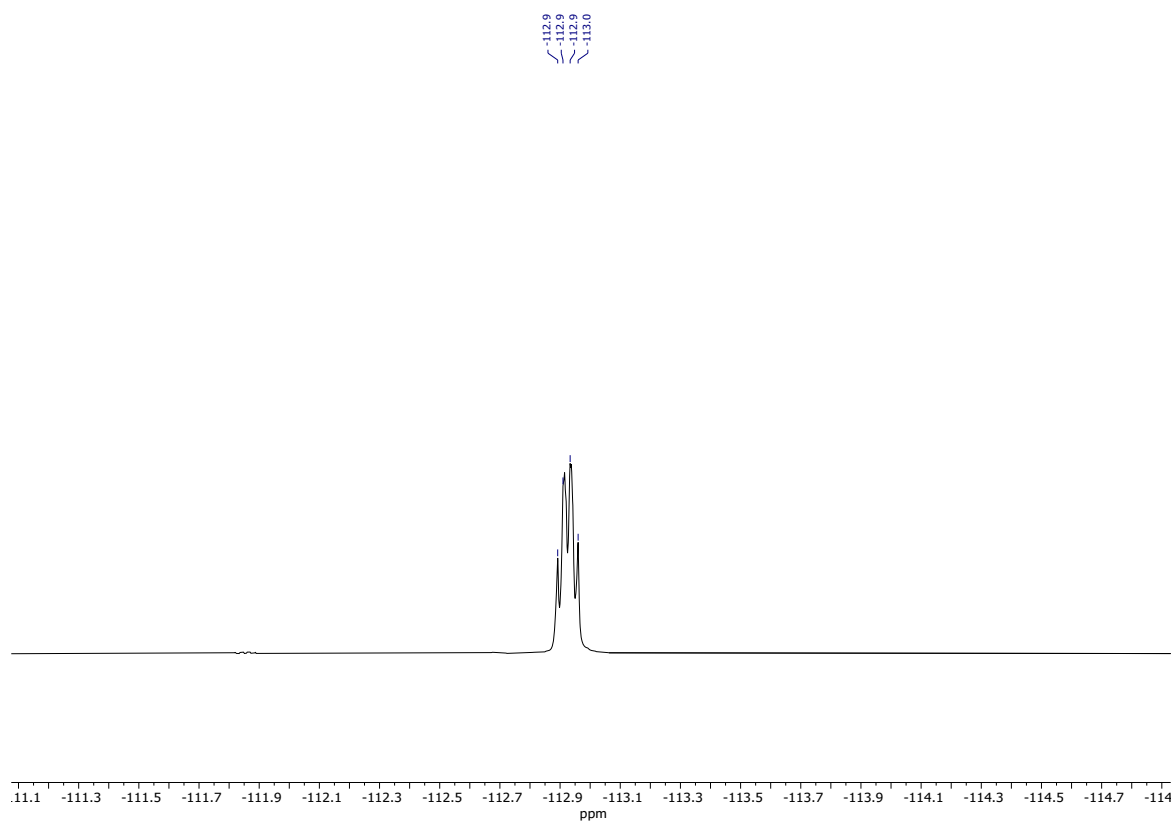

Figure S13.  $^1\text{H}$  NMR (400 MHz,  $\text{CDCl}_3$ ) spectrum of compound **9**.

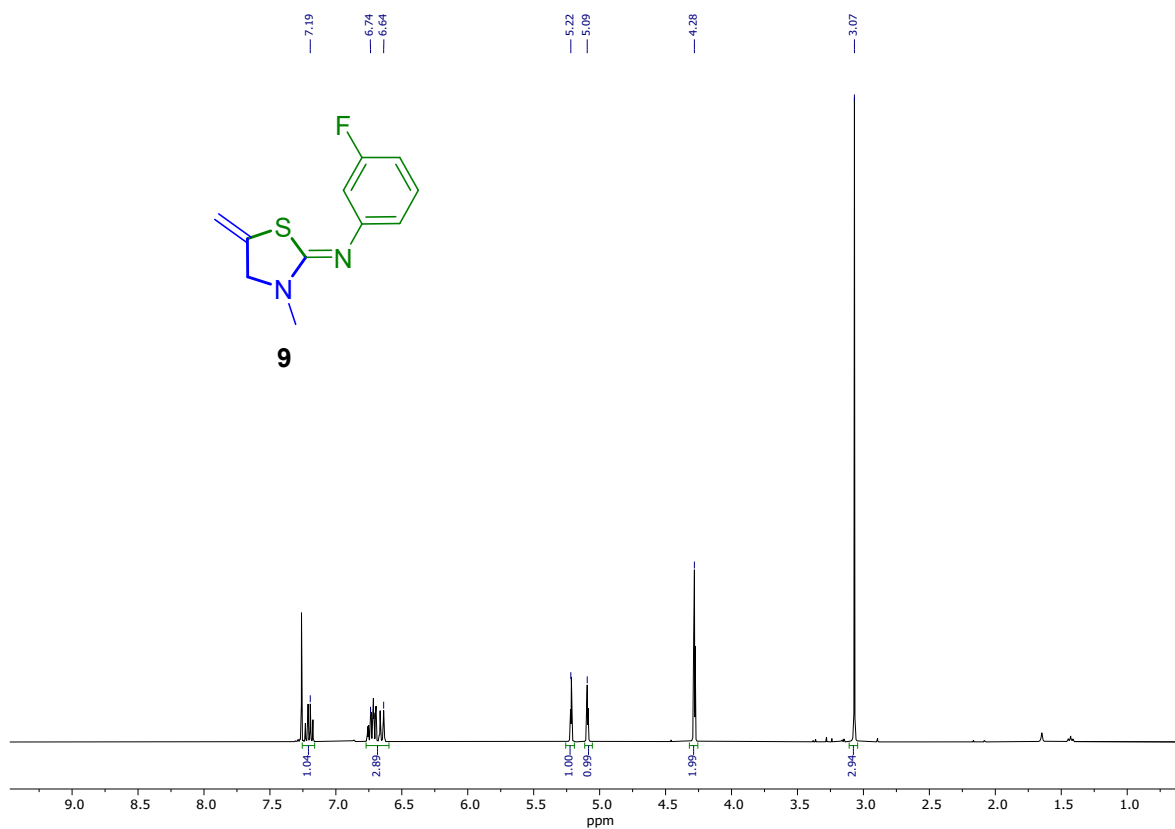

Figure S14.  $^{13}\text{C}\{^1\text{H}\}$  APT NMR (101 MHz,  $\text{CDCl}_3$ ) spectrum of compound **9**.

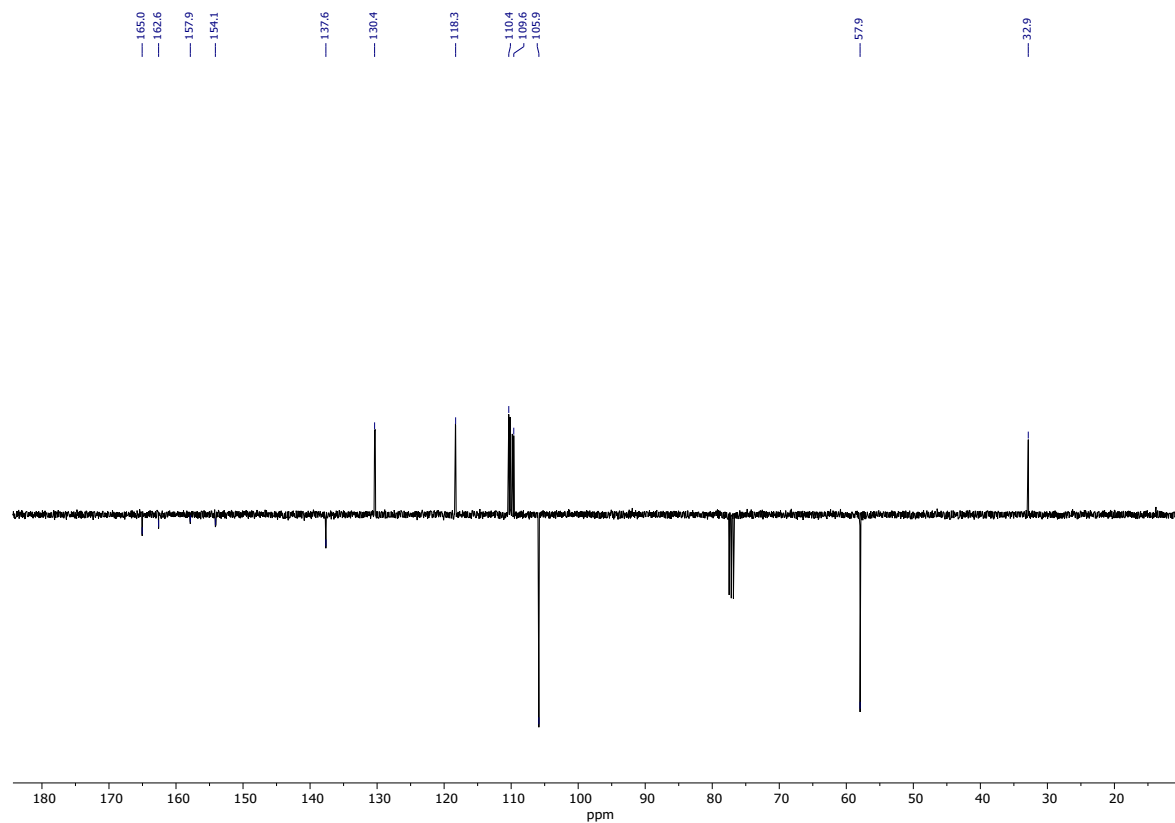



Figure S15.  $^{19}\text{F}$  NMR (376 MHz,  $\text{CDCl}_3$ ) spectrum of compound **9**.

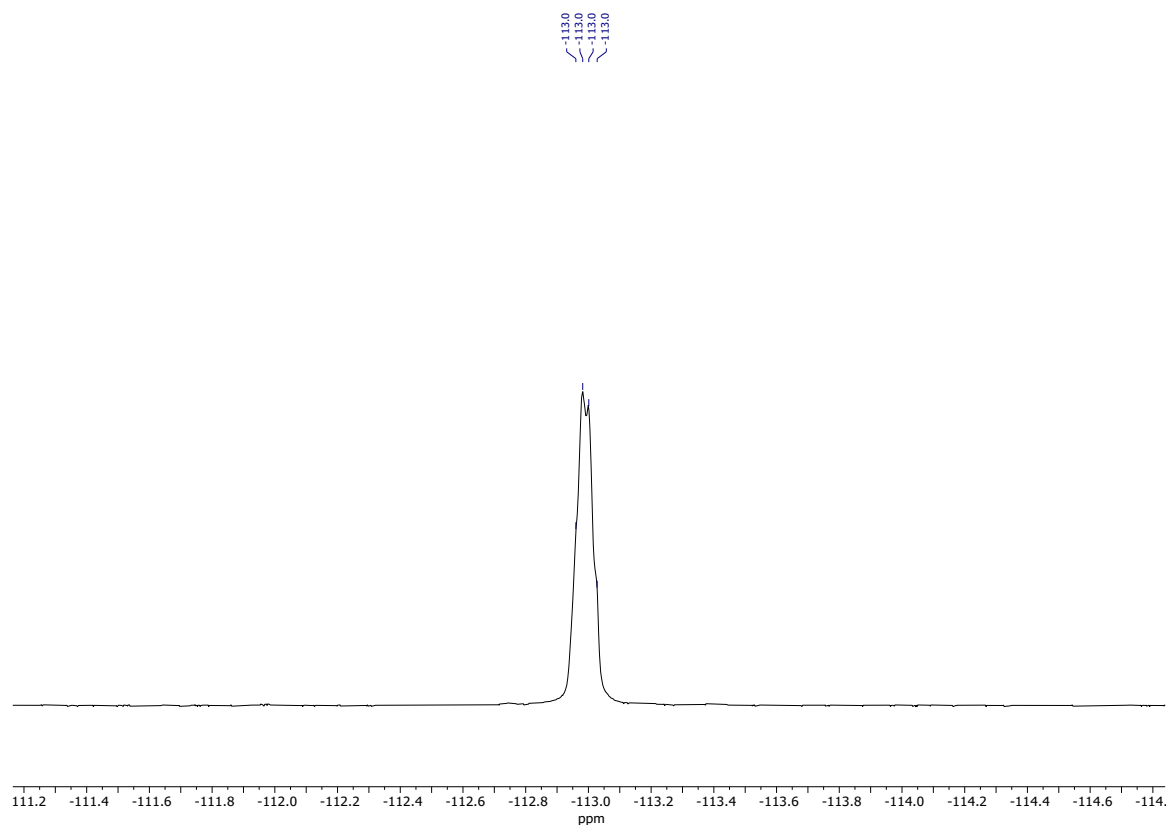

## 2. NMR spectra of thiazolidine-thioureas 10-12

Figure S16.  $^1\text{H}$  NMR (400 MHz,  $(\text{CD}_3)_2\text{CO}$ ) spectrum of compound **10**.

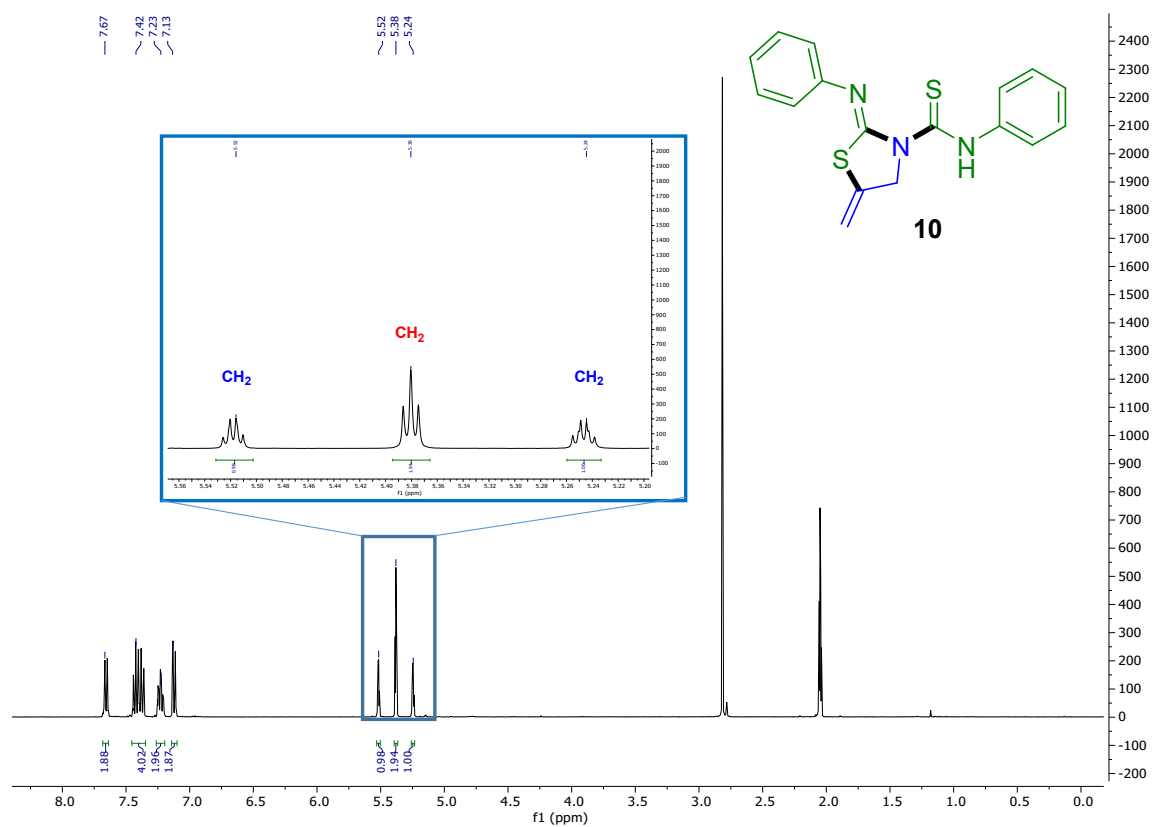

Figure S17.  $^{13}\text{C}\{^1\text{H}\}$  APT NMR (101 MHz,  $(\text{CD}_3)_2\text{CO}$ ) spectrum of compound **10**.

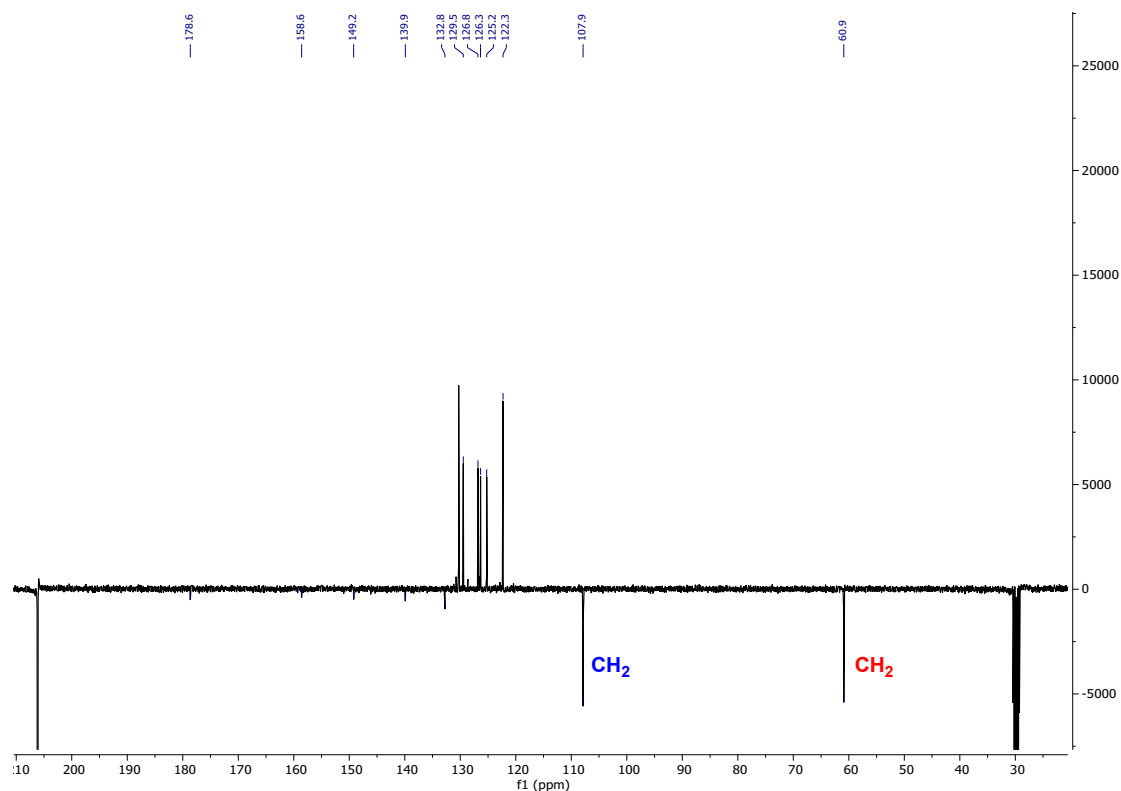

Figure S18.  $^1\text{H}$  NMR (400 MHz,  $(\text{CD}_3)_2\text{CO}$ ) spectrum of compound **11**.

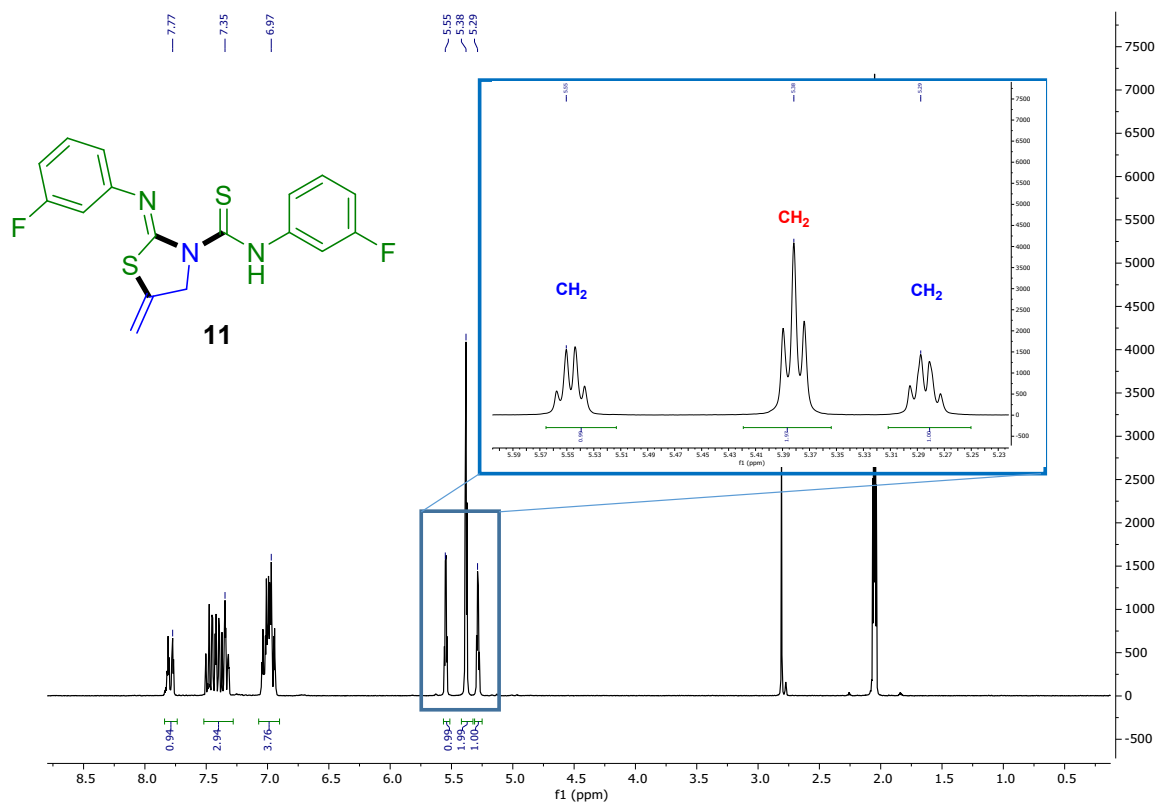

Figure S19.  $^{13}\text{C}\{^1\text{H}\}$  APT NMR (101 MHz,  $(\text{CD}_3)_2\text{CO}$ ) spectrum of compound 11.

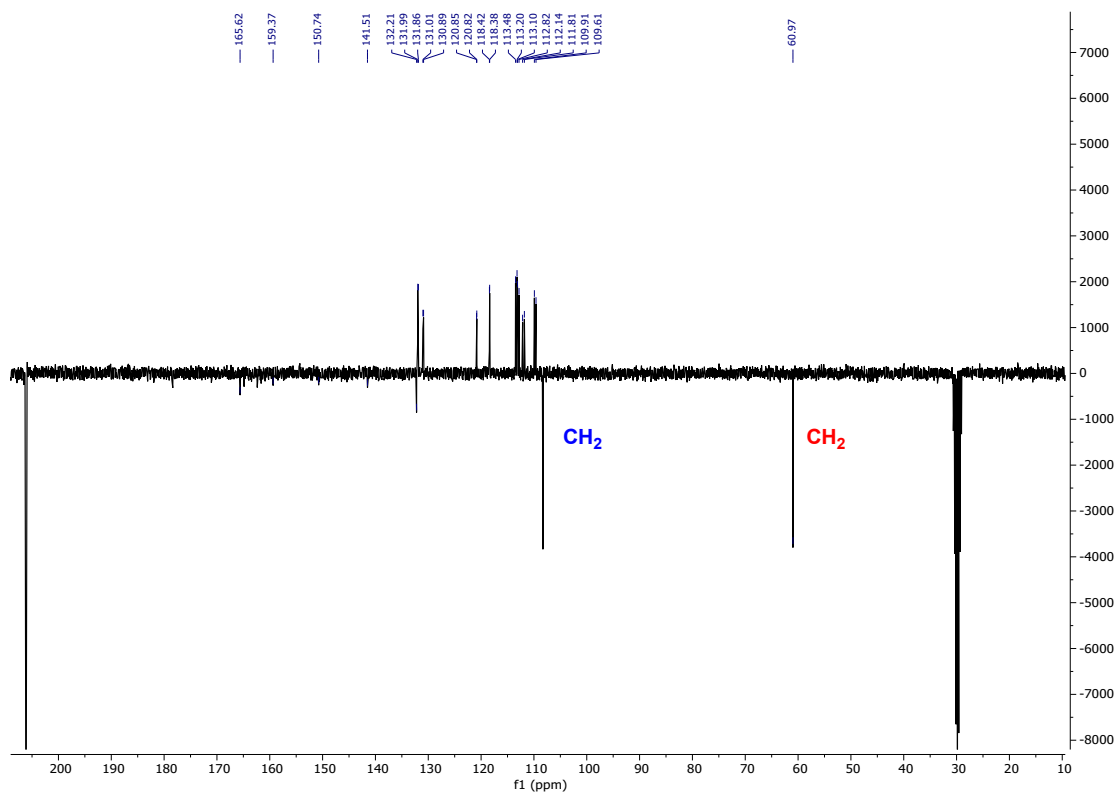

Figure S20.  $^{19}\text{F}$  NMR (376 MHz,  $\text{CDCl}_3$ ) spectrum of compound 11.

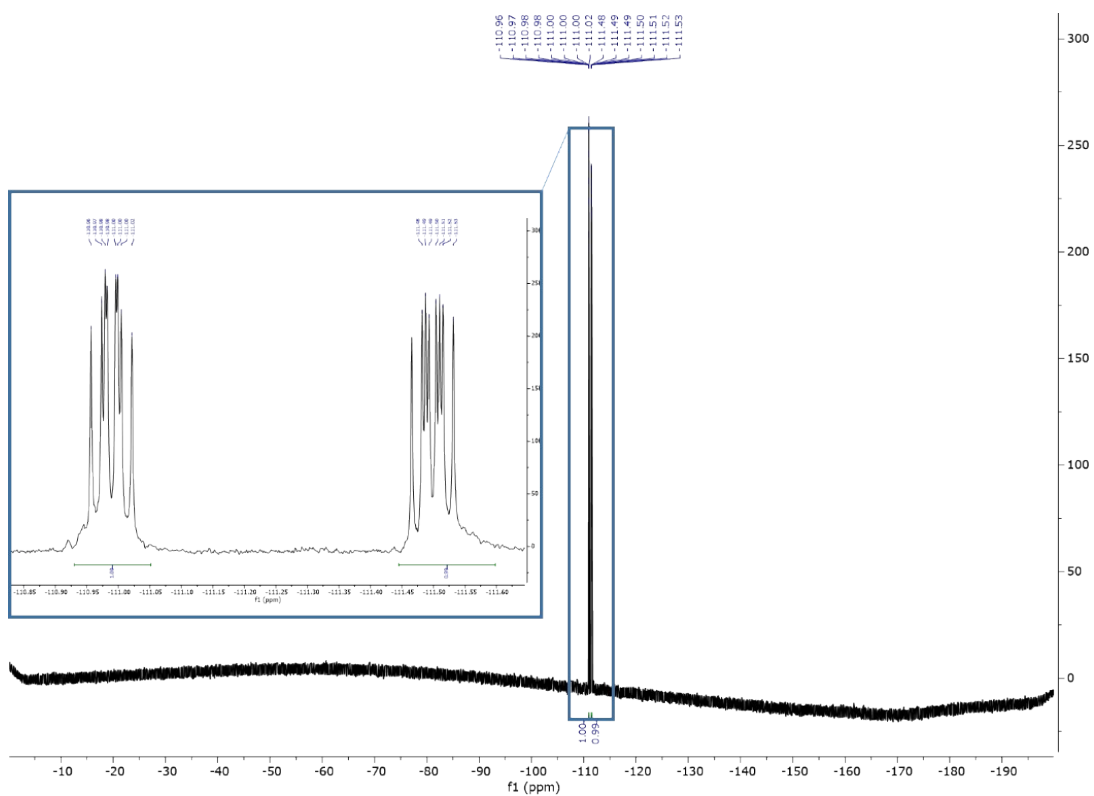

Figure S21.  $^1\text{H}$  NMR (400 MHz,  $(\text{CD}_3)_2\text{CO}$ ) spectrum of compound 12.

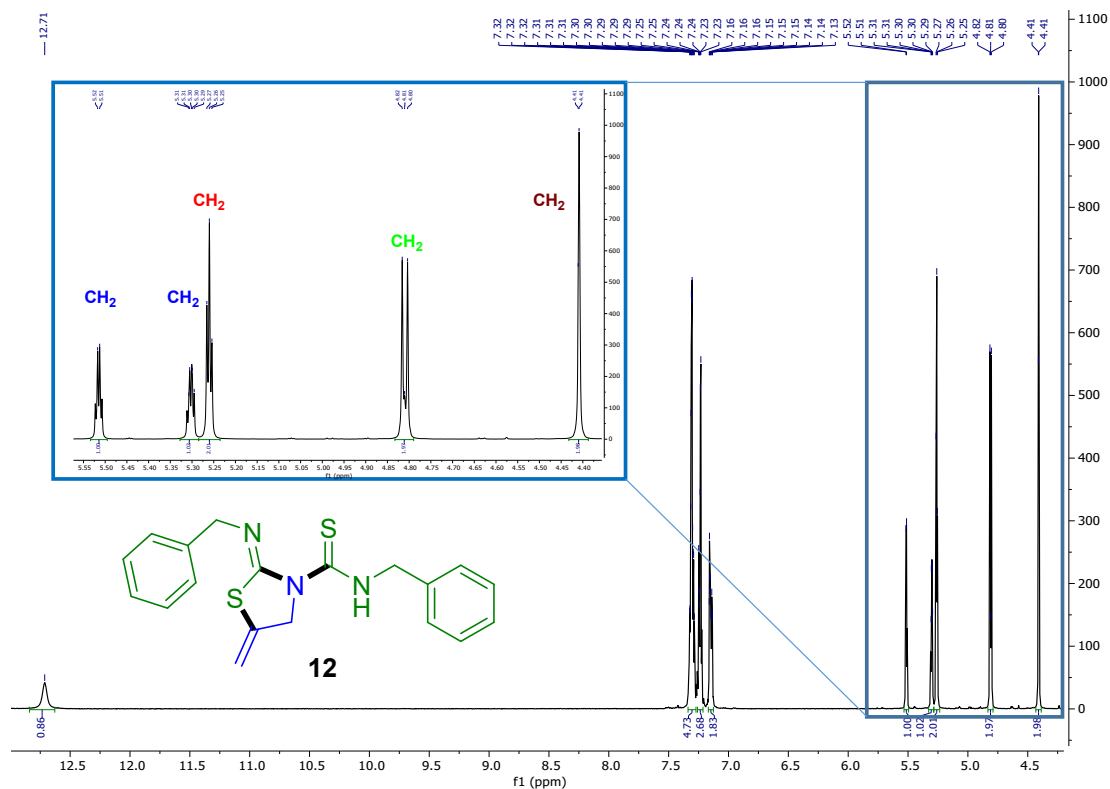

Figure S22.  $^{13}\text{C}\{^1\text{H}\}$  APT NMR (101 MHz,  $(\text{CD}_3)_2\text{CO}$ ) spectrum of compound 12.

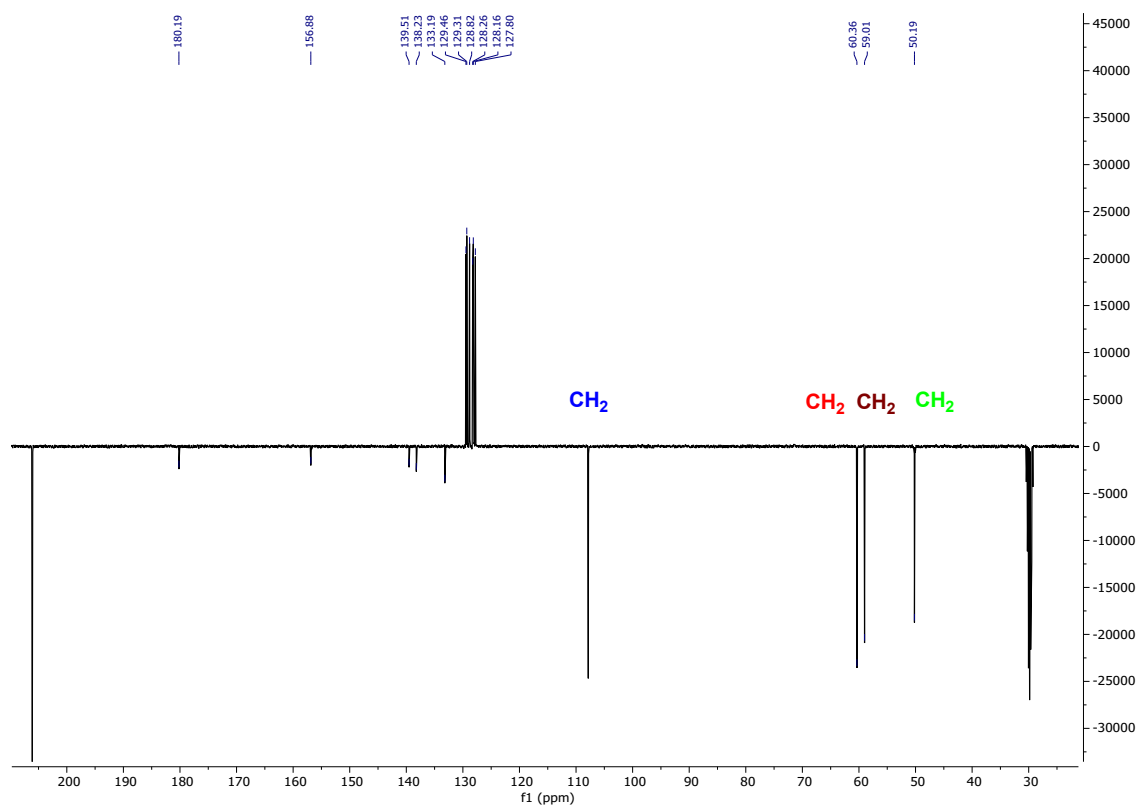

## 2. NMR spectra of silver complexes 13-18

Figure S23.  $^1\text{H}$  NMR (400 MHz,  $(\text{CD}_3)_2\text{CO}$ ) spectrum of complex **13**.

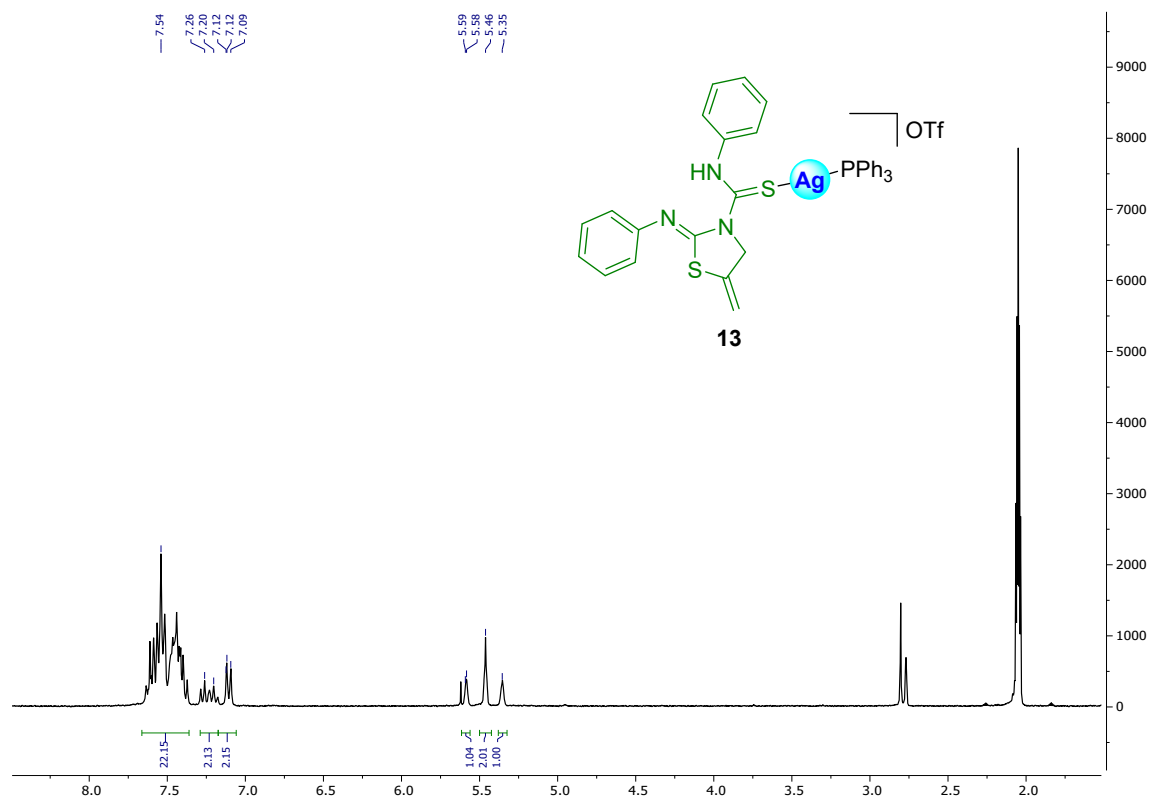

Figure S24.  $^{13}\text{C}\{^1\text{H}\}$  APT NMR (101 MHz,  $(\text{CD}_3)_2\text{CO}$ ) spectrum of complex **13**.

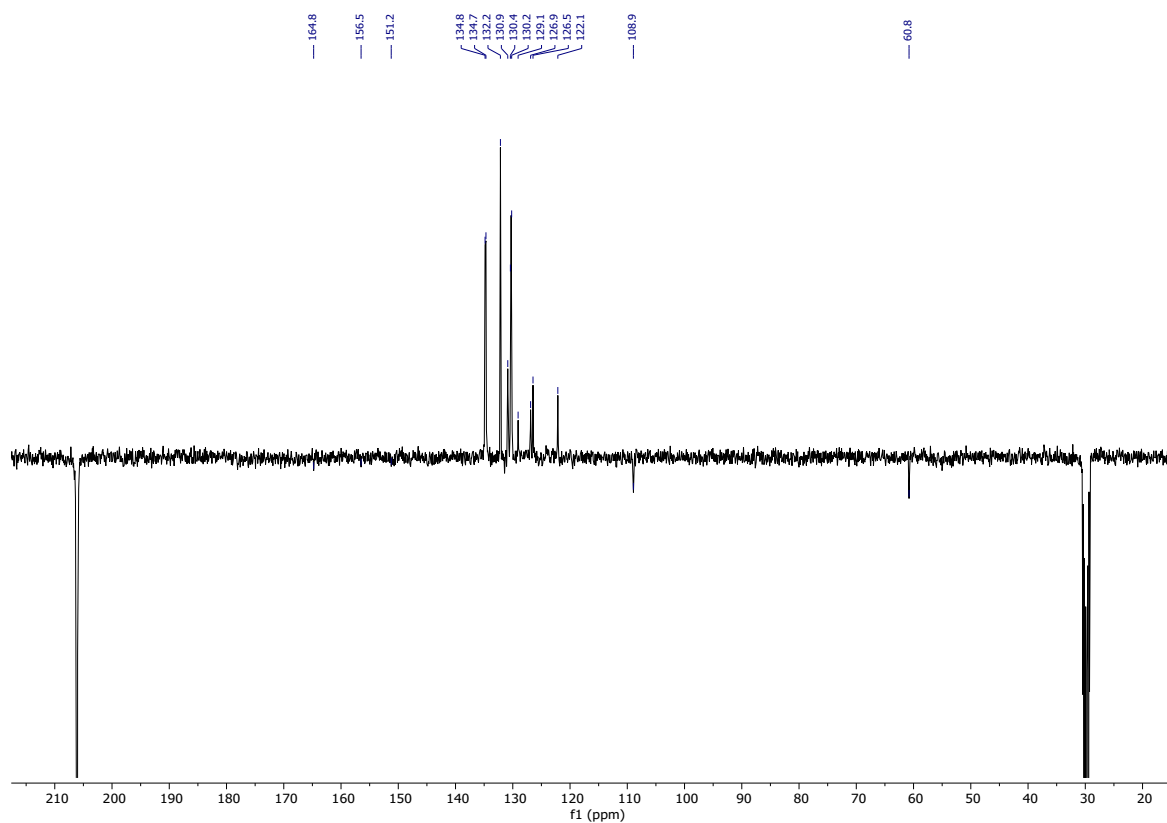

Figure S25.  $^{31}\text{P}\{^1\text{H}\}$  NMR (162 MHz,  $(\text{CD}_3)_2\text{CO}$ ) spectrum of complex **13**.

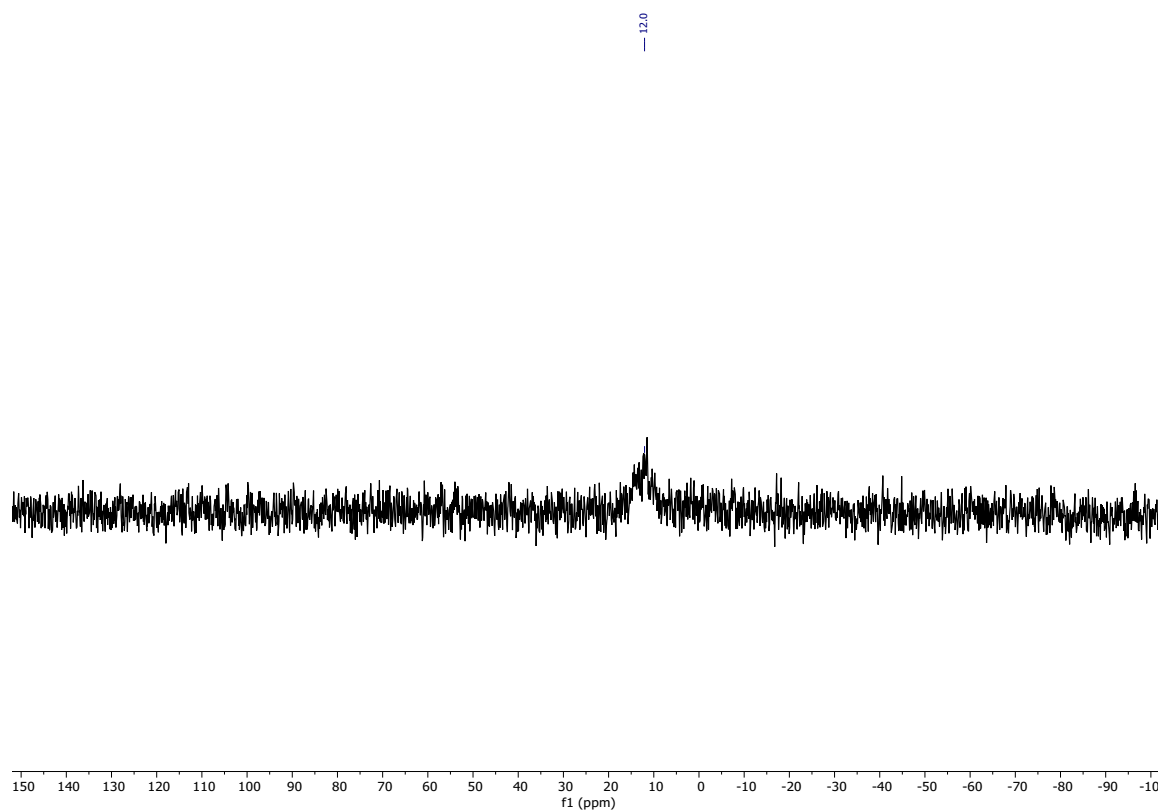

Figure S26.  $^1\text{H}$  NMR (400 MHz,  $(\text{CD}_3)_2\text{CO}$ ) spectrum of complex **14**.

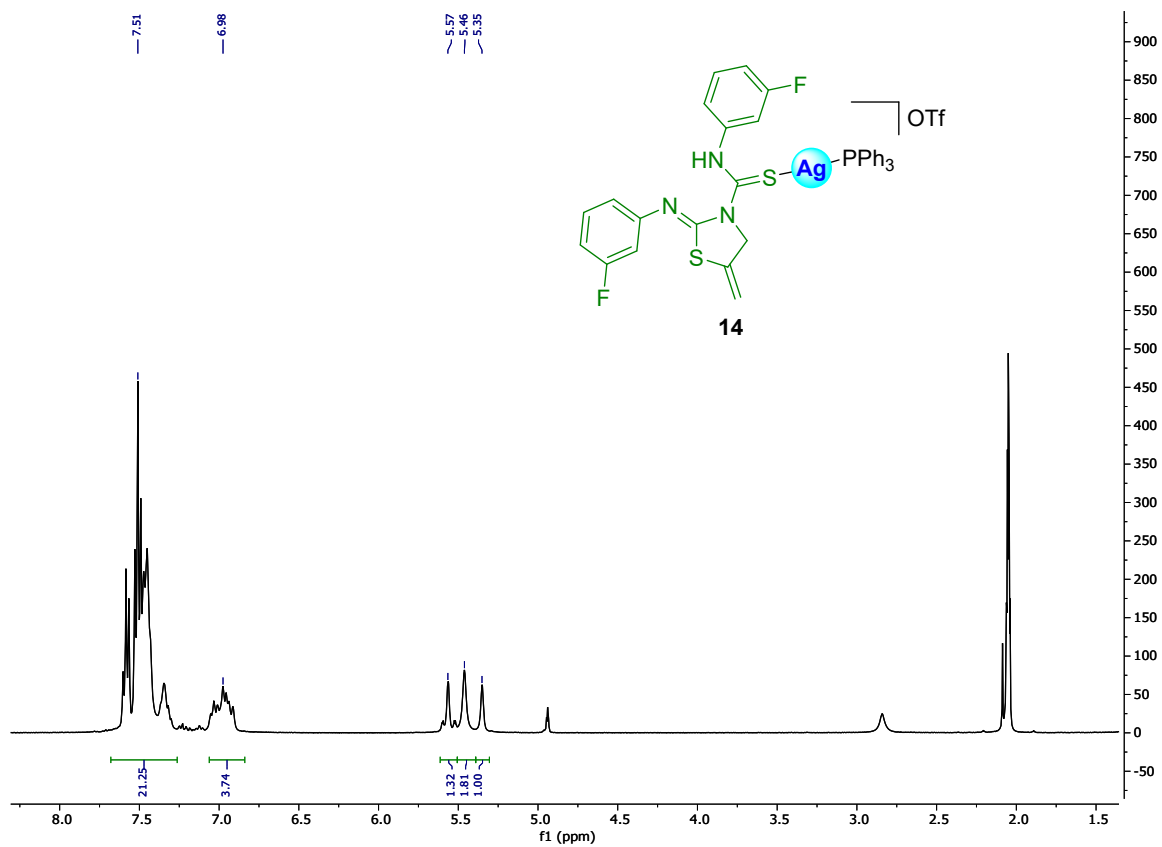

Figure S27.  $^{13}\text{C}\{^1\text{H}\}$  APT NMR (101 MHz,  $(\text{CD}_3)_2\text{CO}$ ) spectrum of complex **14**.

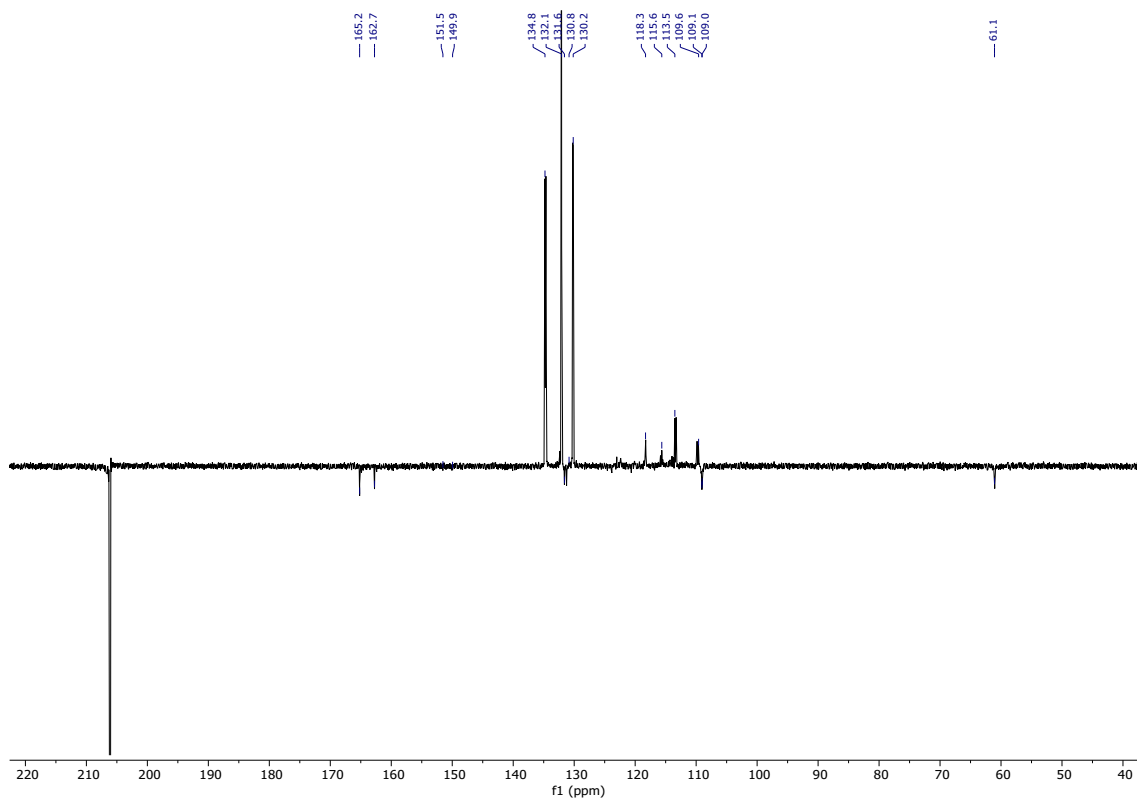

Figure S28.  $^{19}\text{F}$  NMR (376 MHz,  $(\text{CD}_3)_2\text{CO}$ ) spectrum of complex **14**.

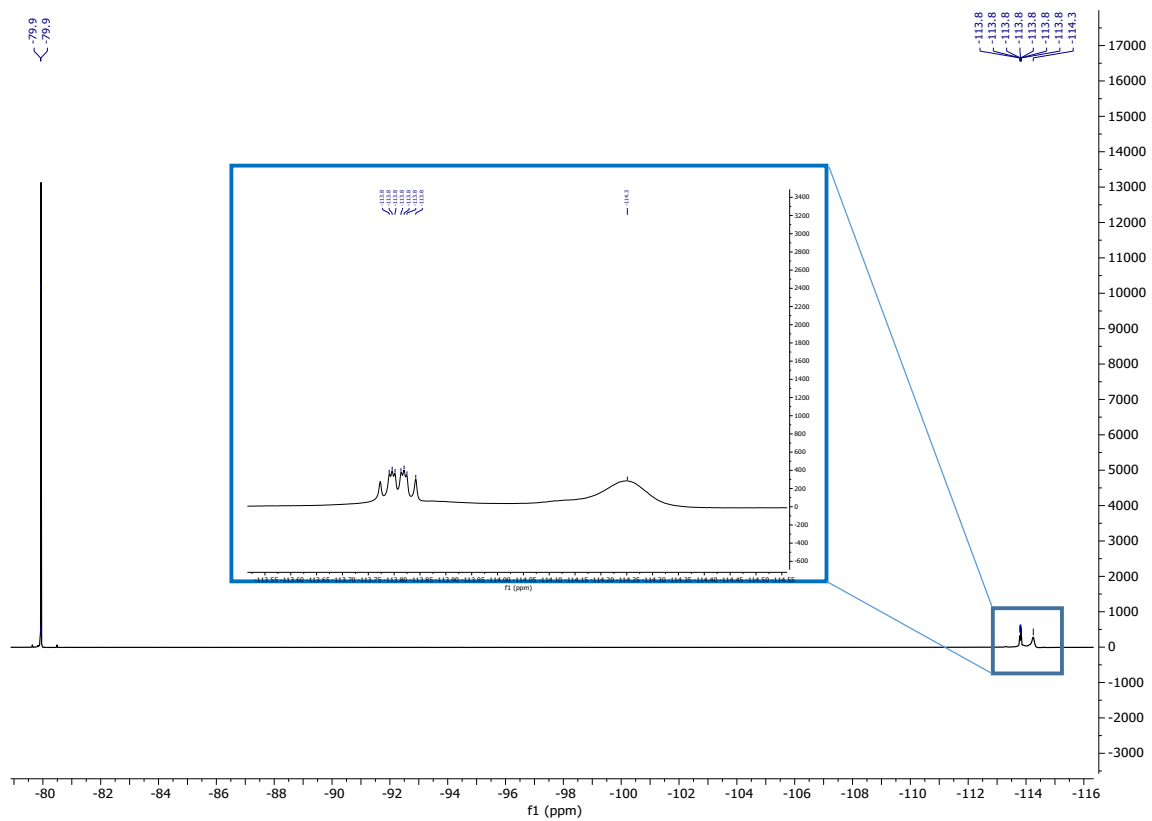

Figure S29.  $^{31}\text{P}\{^1\text{H}\}$  NMR (162 MHz,  $(\text{CD}_3)_2\text{CO}$ ) spectrum of complex **14**.

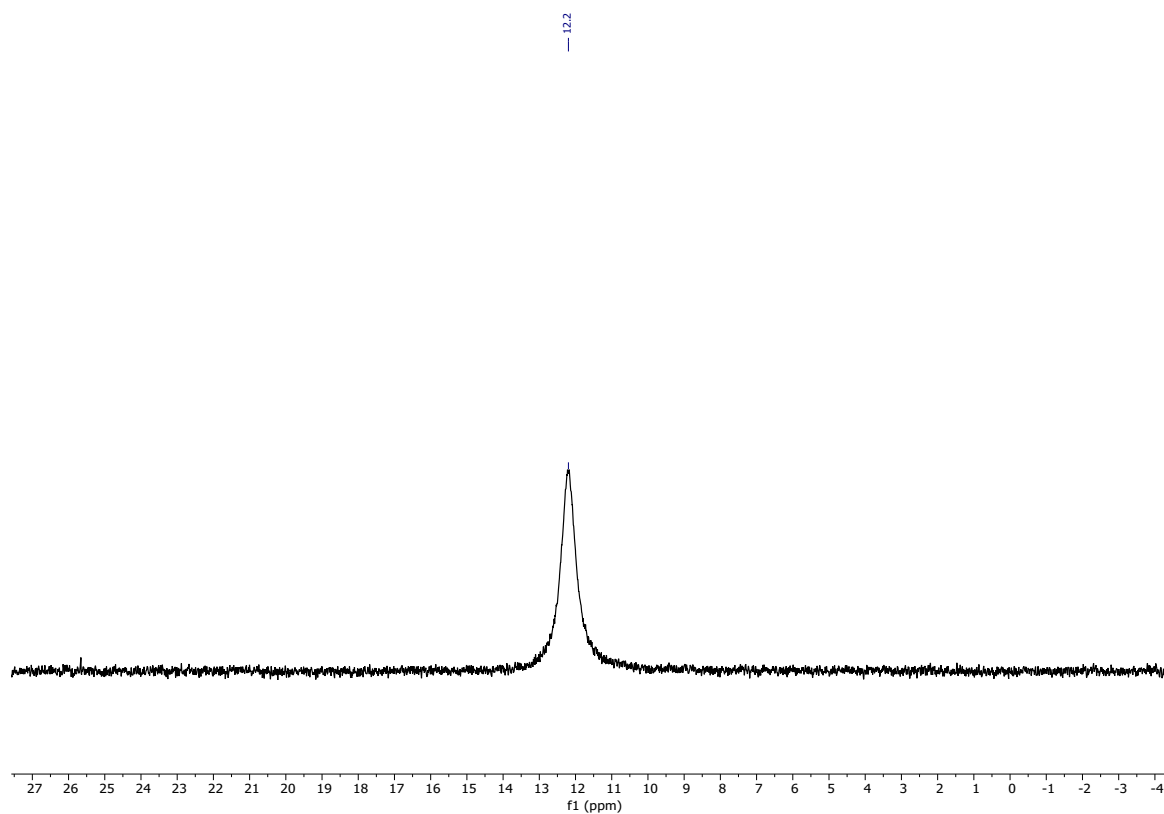

Figure S30.  $^1\text{H}$  NMR (400 MHz,  $(\text{CD}_3)_2\text{CO}$ ) spectrum of complex **15**.

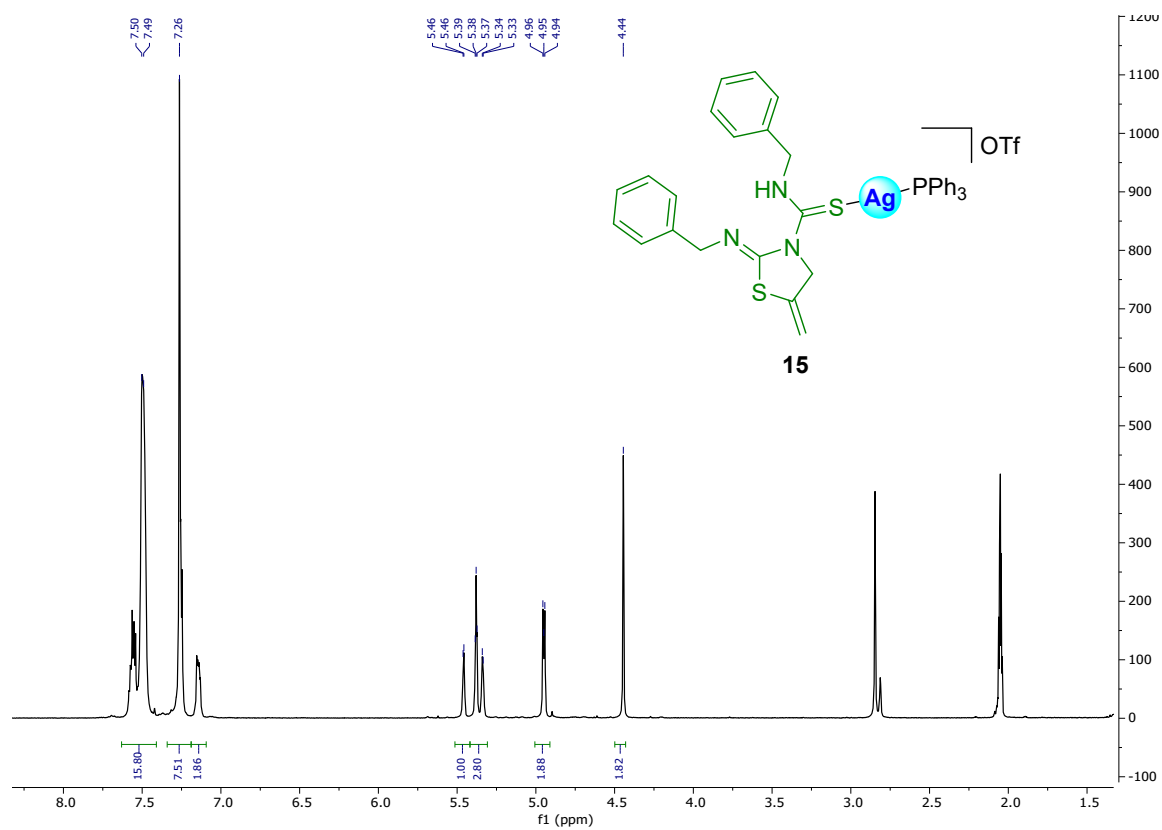



**Figure S31.**  $^{13}\text{C}\{^1\text{H}\}$  APT NMR (101 MHz,  $(\text{CD}_3)_2\text{CO}$ ) spectrum of complex **15**.

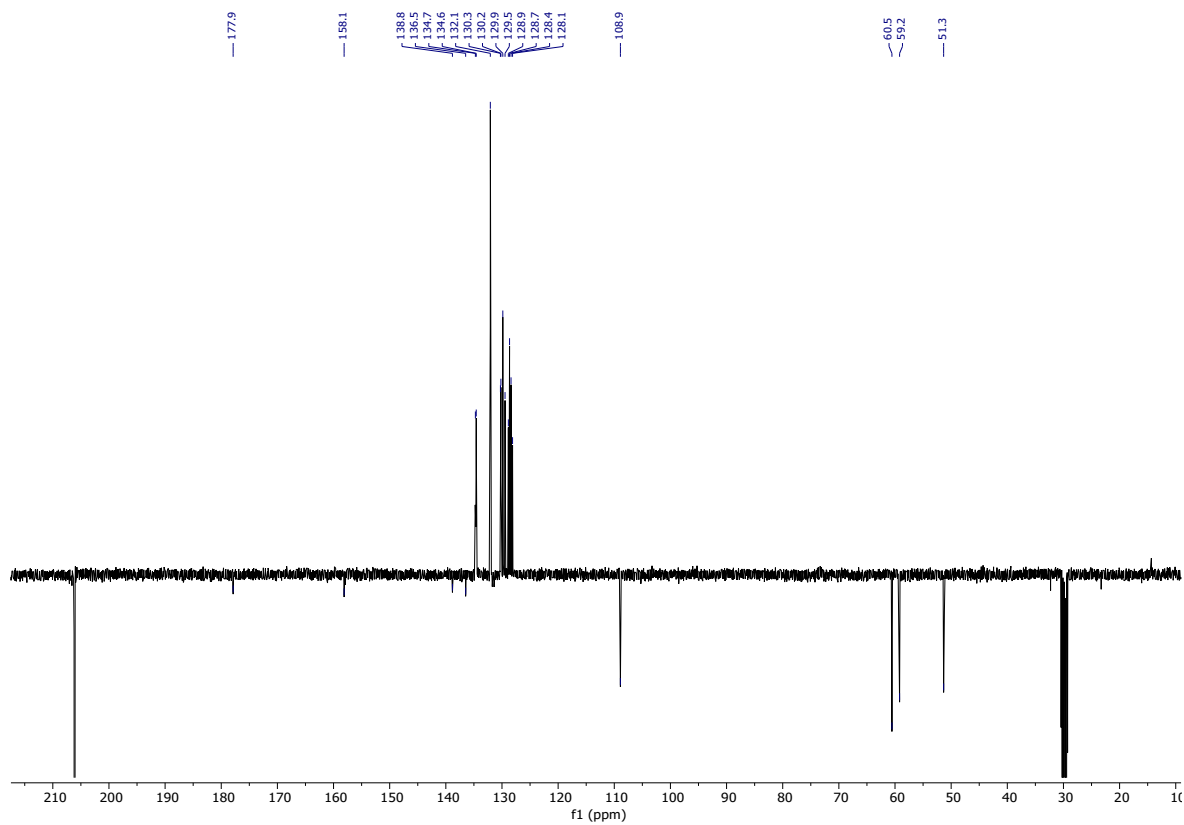

**Figure S32.**  $^{31}\text{P}\{^1\text{H}\}$  NMR (ppm) (162 MHz,  $(\text{CD}_3)_2\text{CO}$ ) spectrum of complex **15**.

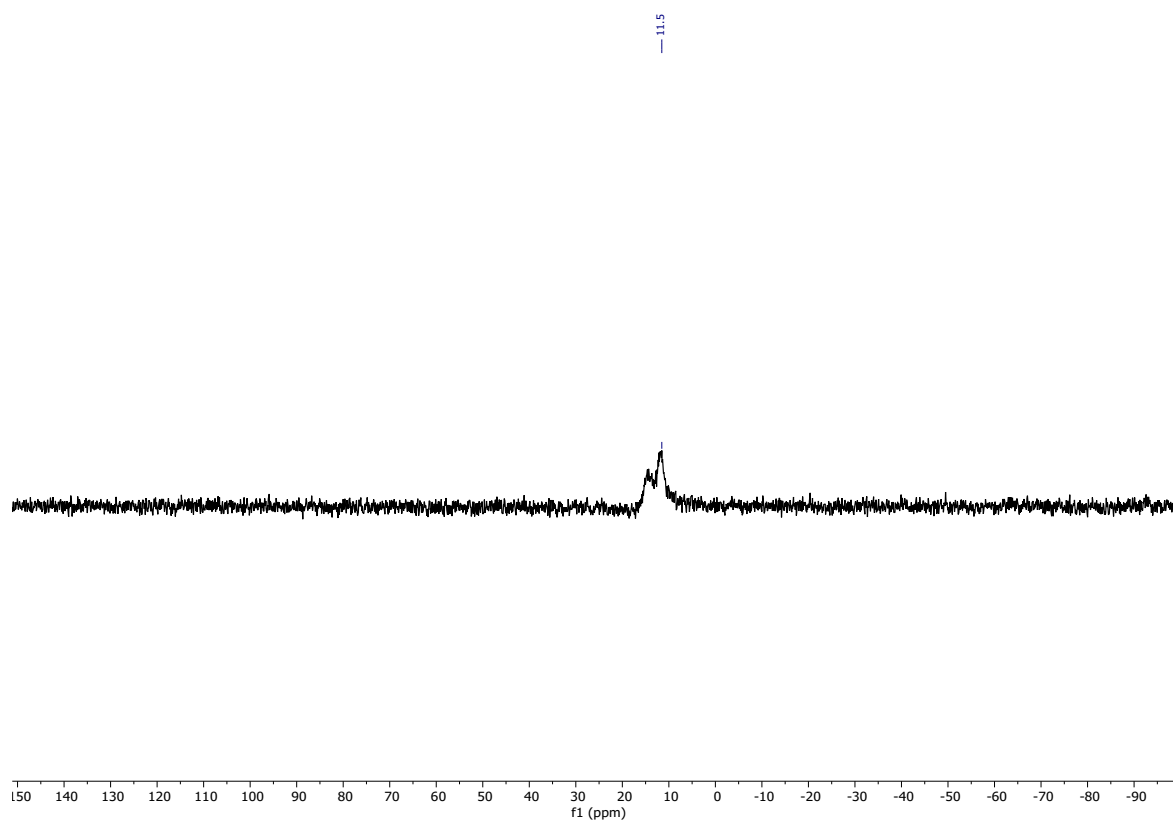

Figure S33.  $^1\text{H}$  NMR (400 MHz,  $(\text{CD}_3)_2\text{CO}$ ) spectrum of complex **16**.

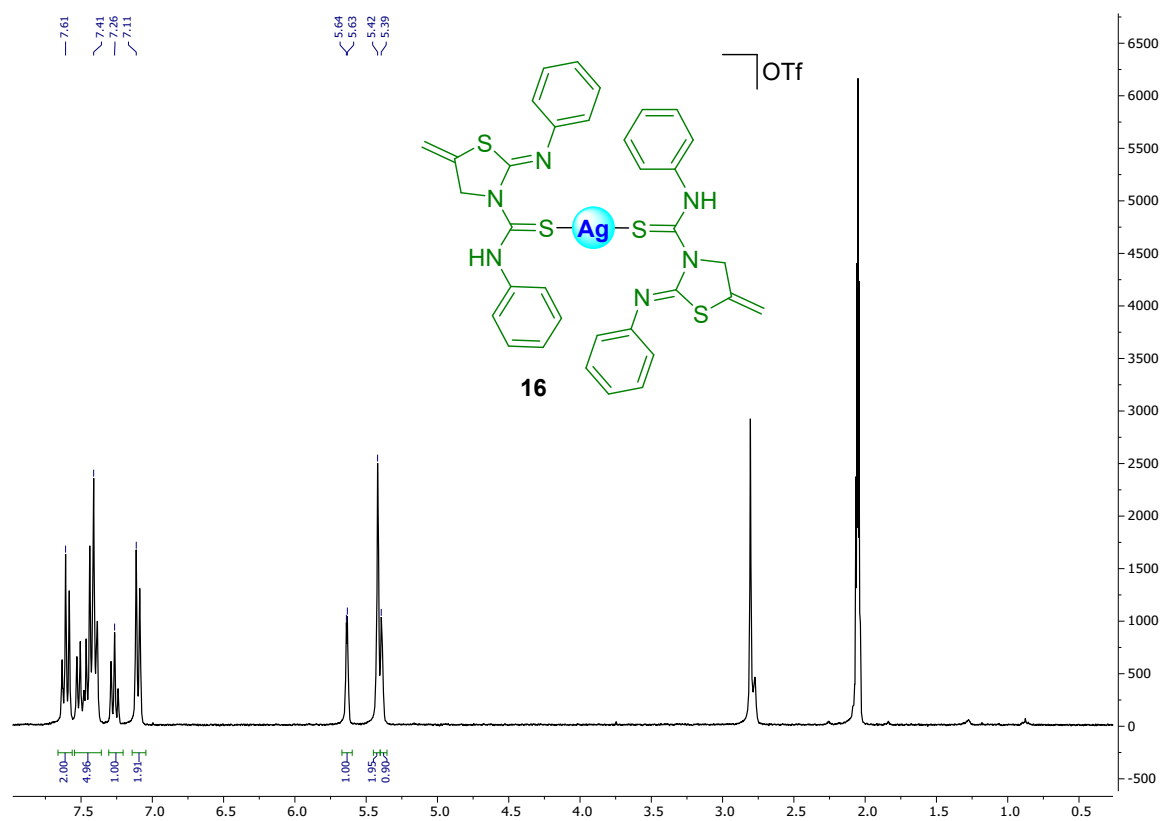

Figure S34.  $^{13}\text{C}\{^1\text{H}\}$  APT NMR (101 MHz,  $(\text{CD}_3)_2\text{CO}$ ) spectrum of complex **16**.

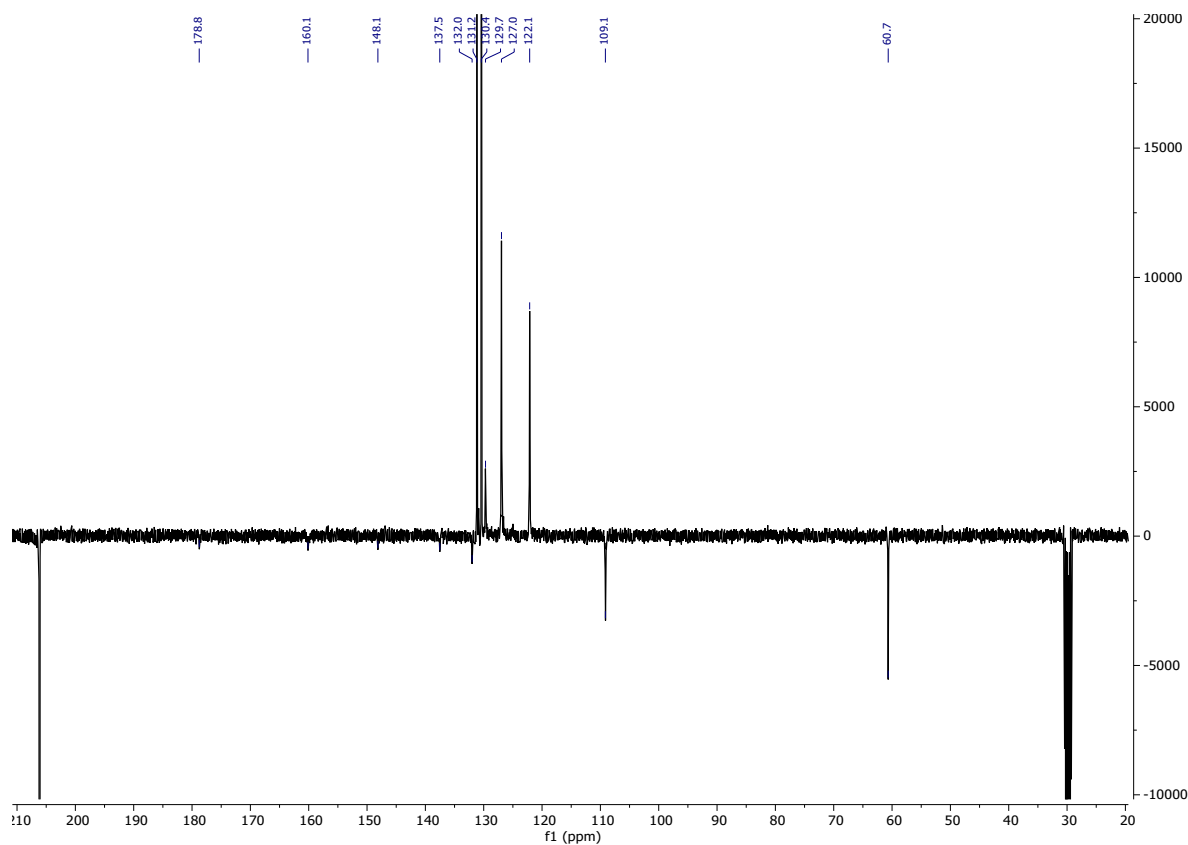

Figure S35.  $^1\text{H}$  NMR (400 MHz,  $(\text{CD}_3)_2\text{CO}$ ) spectrum of complex **17**.

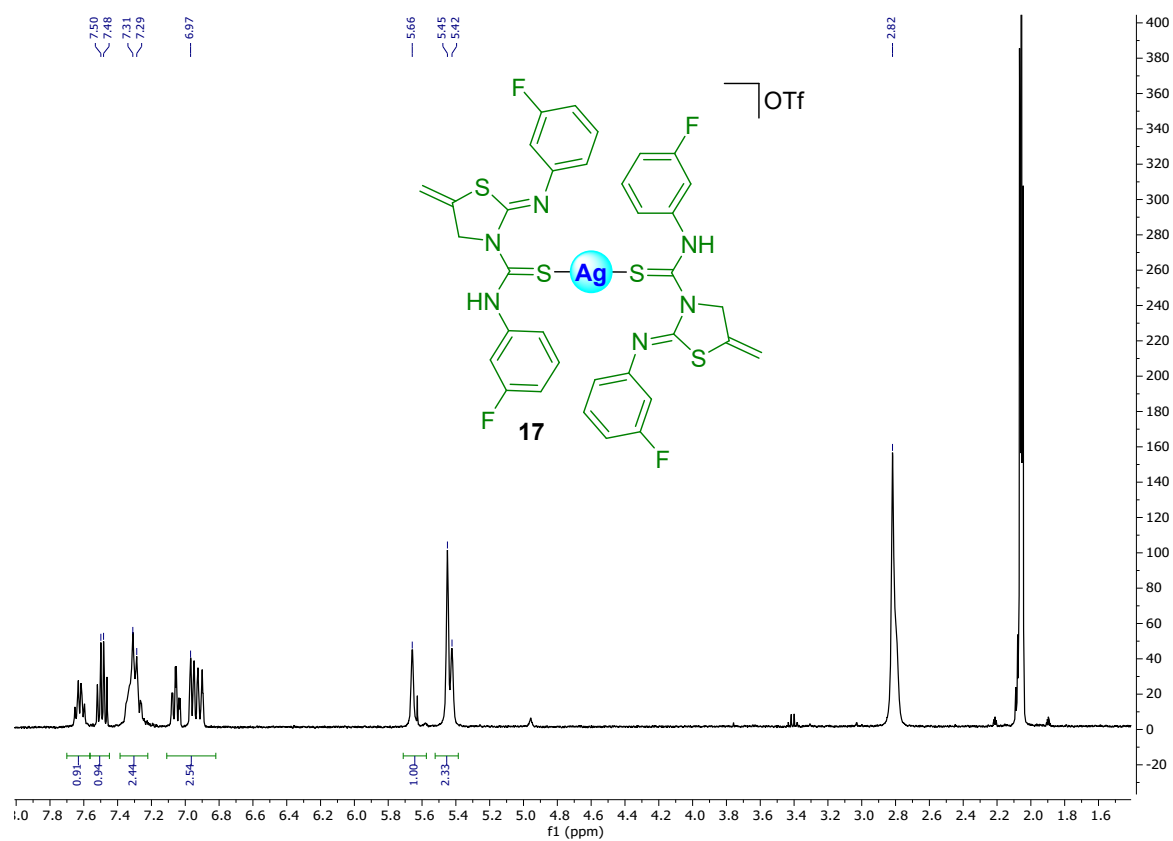

Figure S36.  $^{13}\text{C}\{^1\text{H}\}$  APT NMR (101 MHz,  $(\text{CD}_3)_2\text{CO}$ ) spectrum of complex **17**.

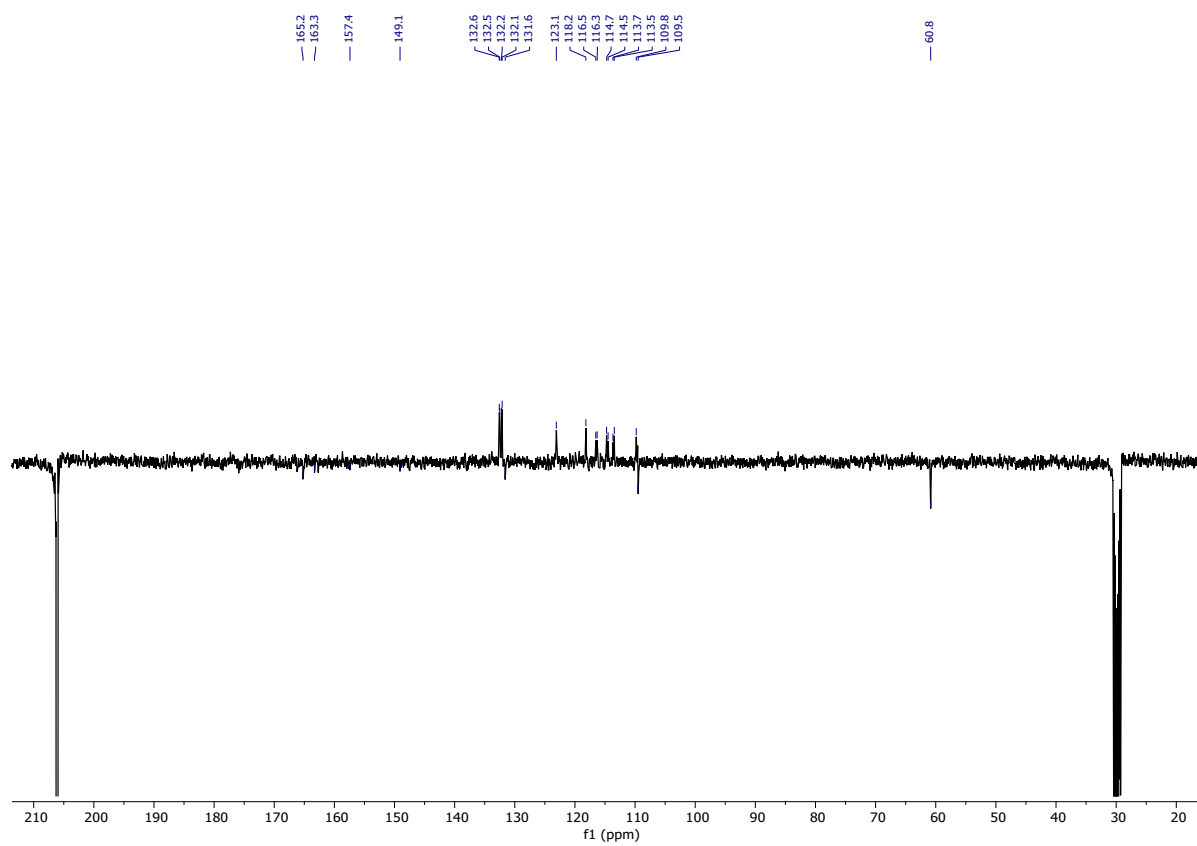

**Figure 37.**  $^{19}\text{F}$  NMR (376 MHz,  $(\text{CD}_3)_2\text{CO}$ ) spectrum of complex **17**.

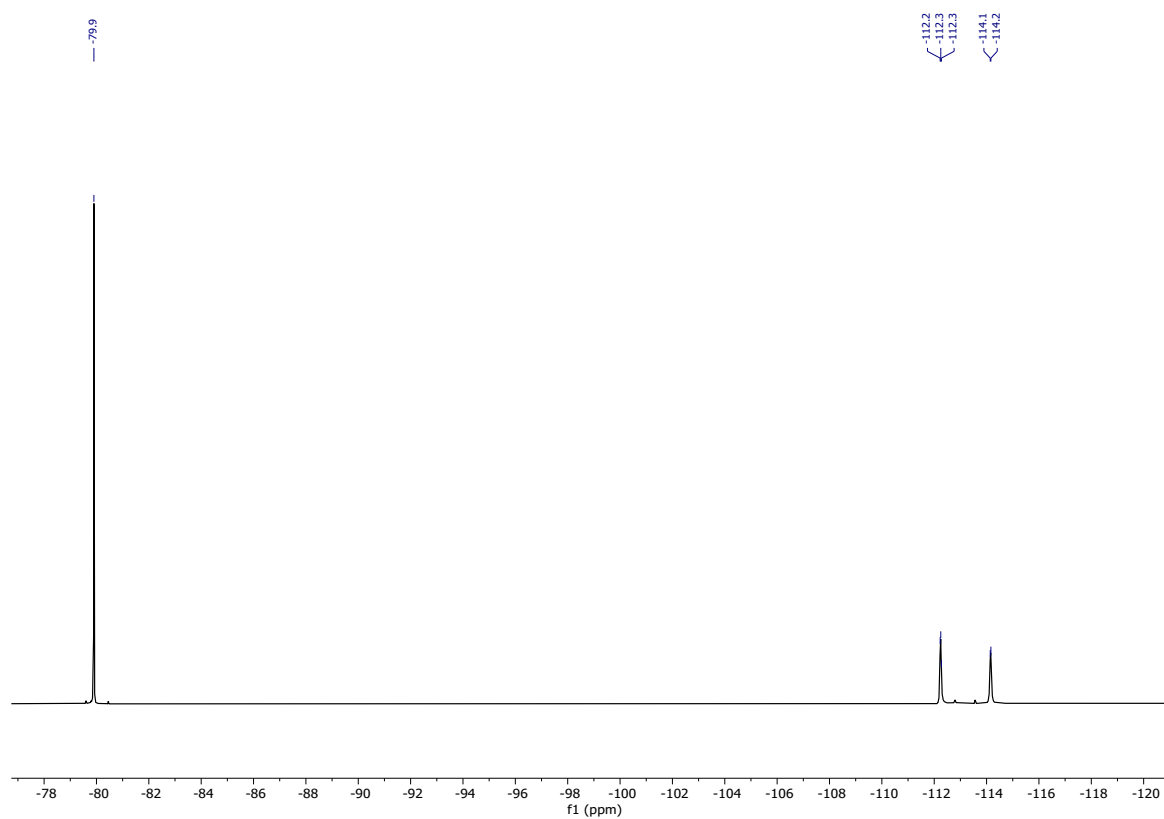

**Figure S38.**  $^1\text{H}$  NMR (400 MHz,  $(\text{CD}_3)_2\text{CO}$ ) spectrum of complex **18**.

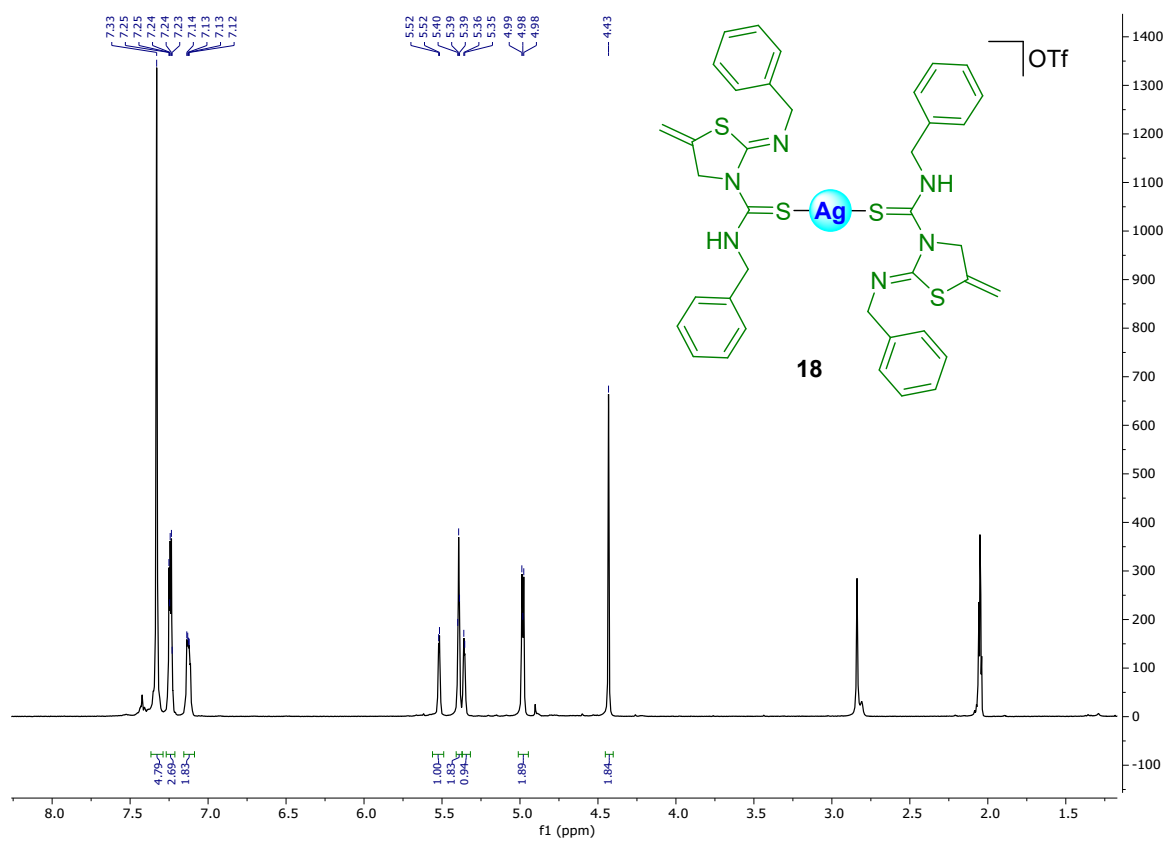

**Figure S39.**  $^{13}\text{C}\{^1\text{H}\}$  APT NMR (101 MHz,  $(\text{CD}_3)_2\text{CO}$ ) spectrum of complex **18**.

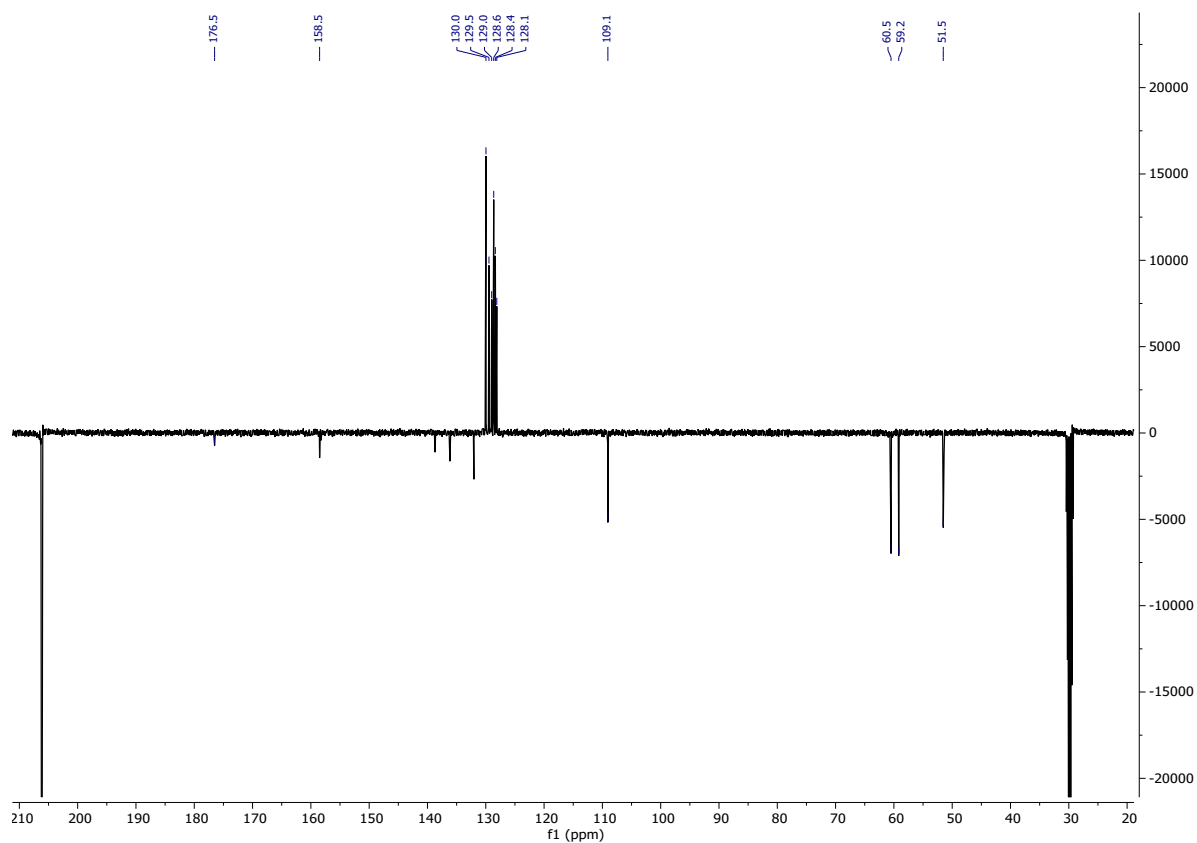

### 3. NMR spectra of gold complexes 19-27

**Figure S40.**  $^1\text{H}$  NMR (400 MHz,  $(\text{CD}_3)_2\text{CO}$ ) spectrum of complex **19**.

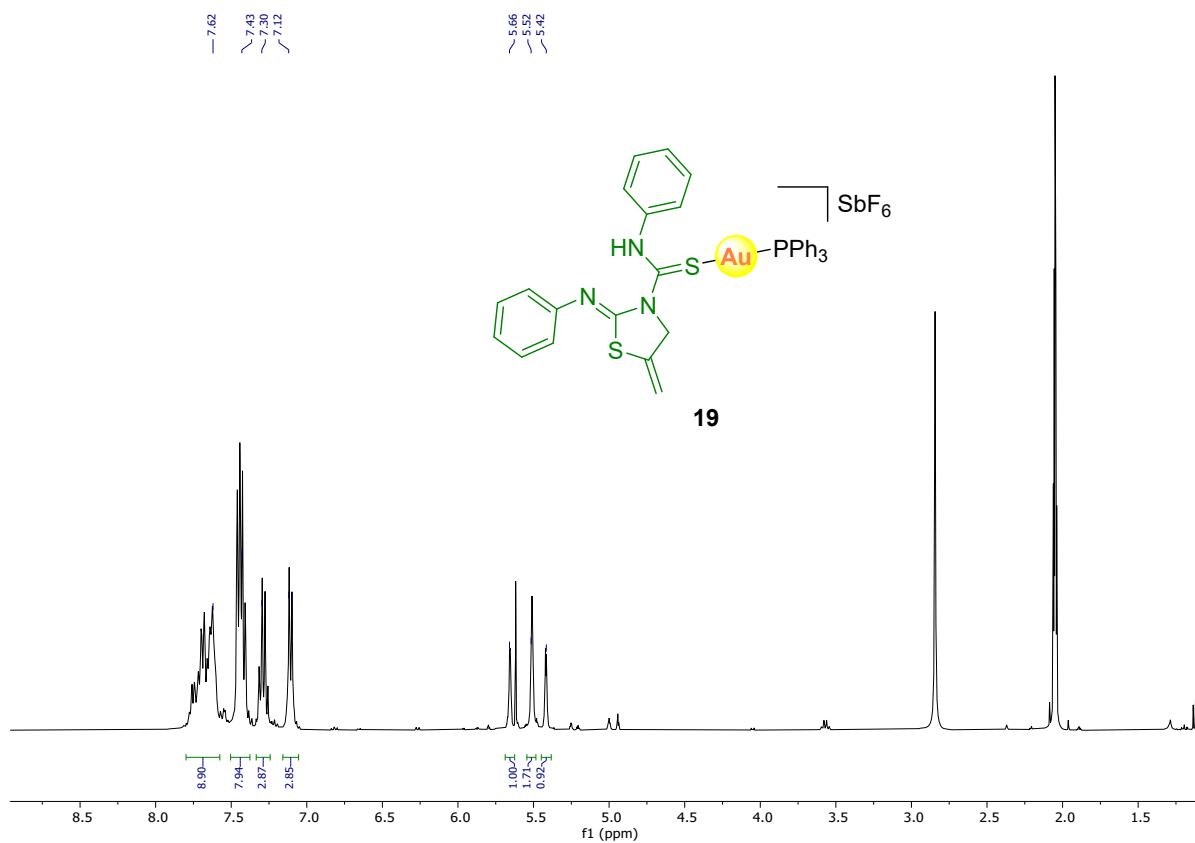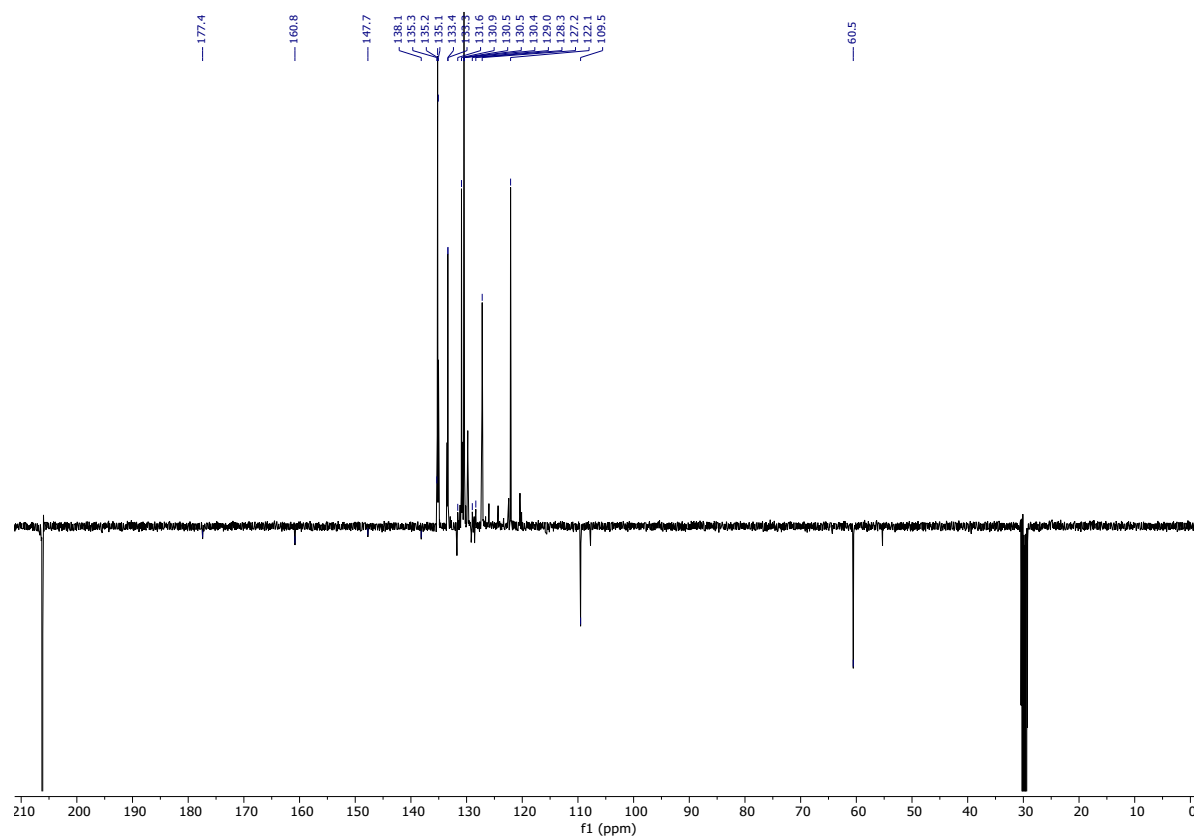

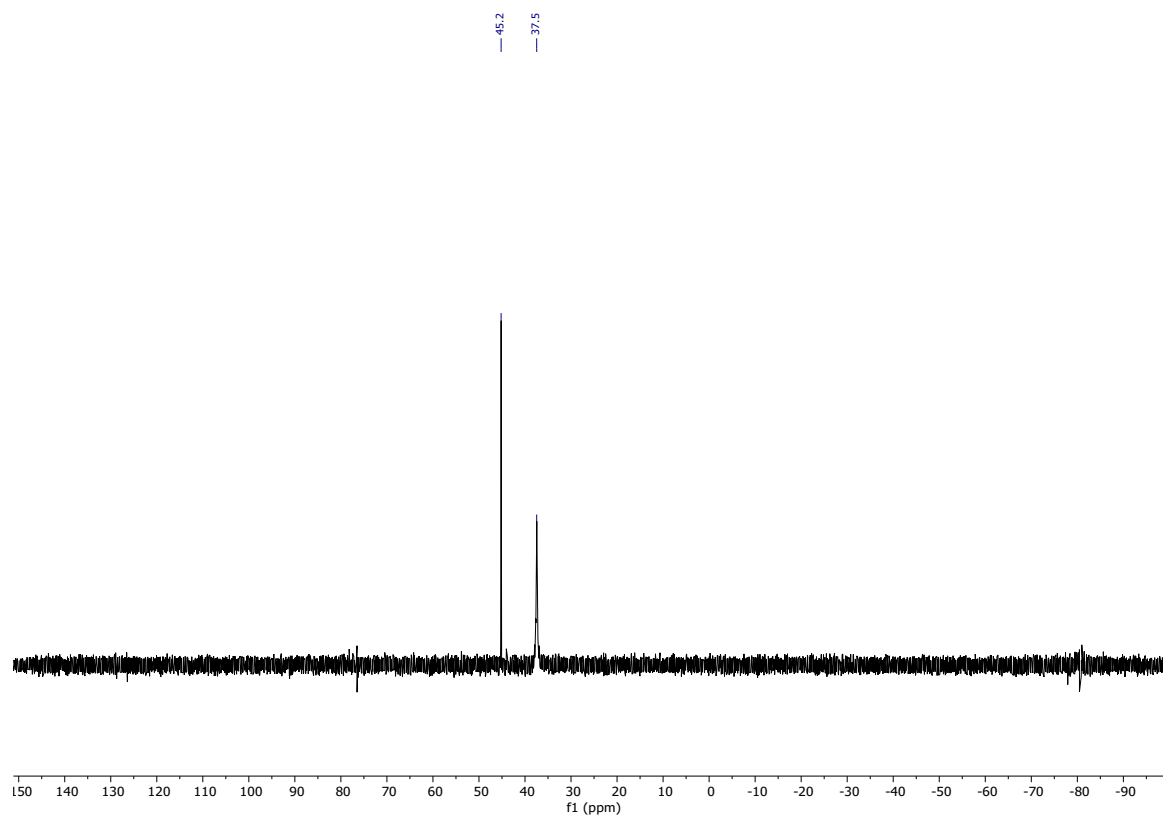

Figure S43.  $^1\text{H}$  NMR (400 MHz,  $(\text{CD}_3)_2\text{CO}$ ) spectrum of complex **20**.

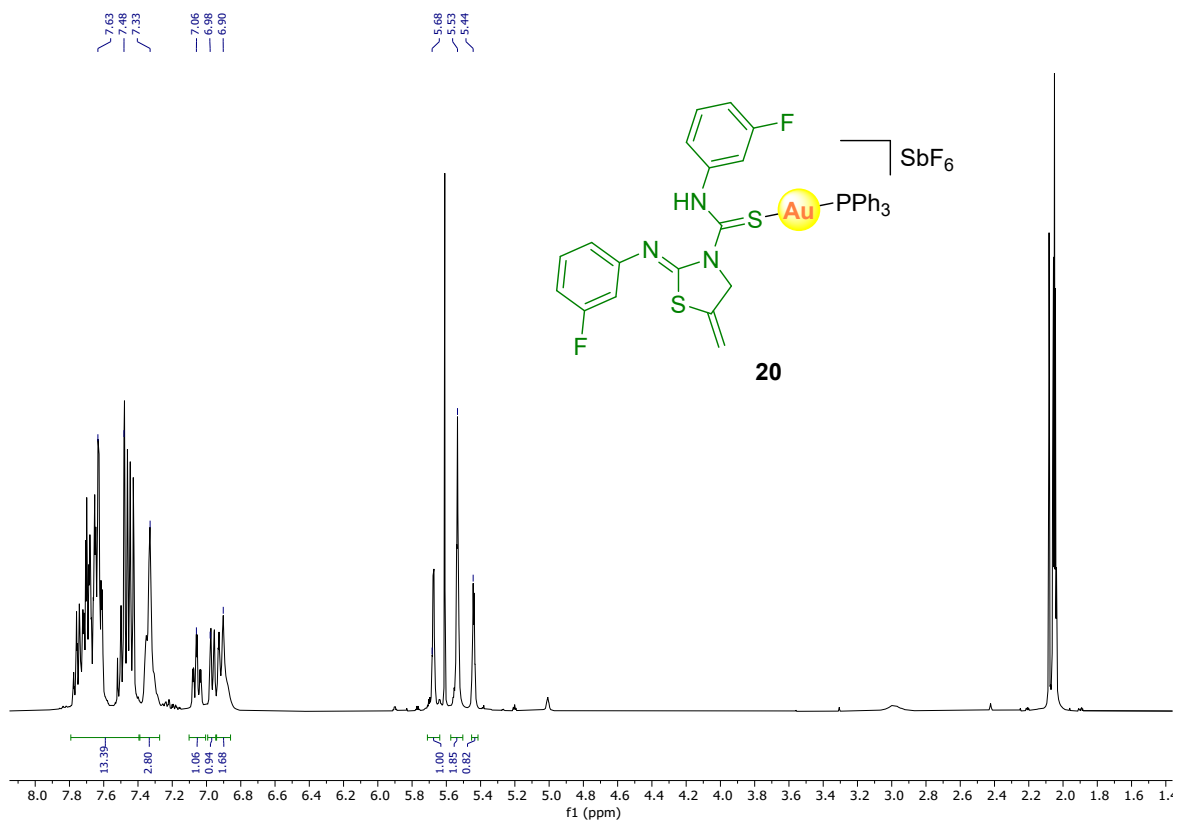

Figure S44.  $^{13}\text{C}\{^1\text{H}\}$  APT NMR (101 MHz,  $(\text{CD}_3)_2\text{CO}$ ) spectrum of complex **20**.

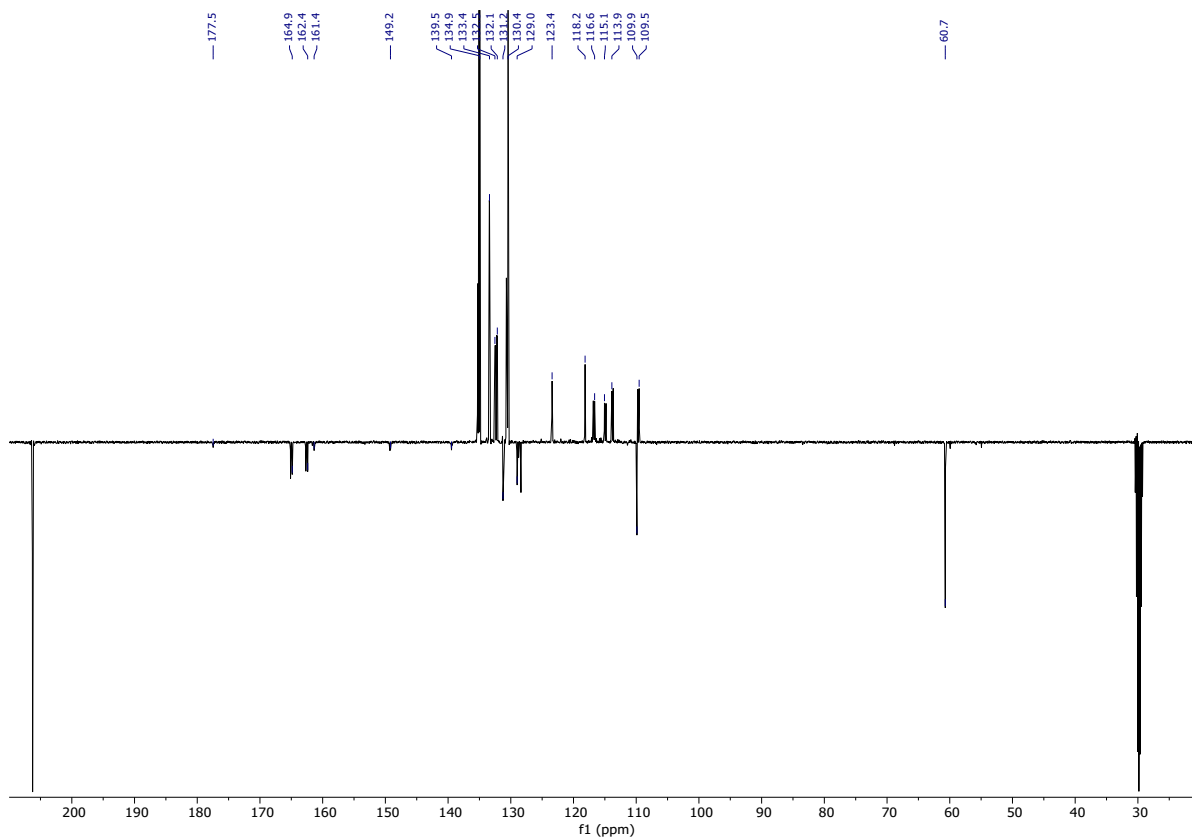

Figure S45.  $^{19}\text{F}$  NMR (376 MHz,  $(\text{CD}_3)_2\text{CO}$ ) spectrum of complex **20**.

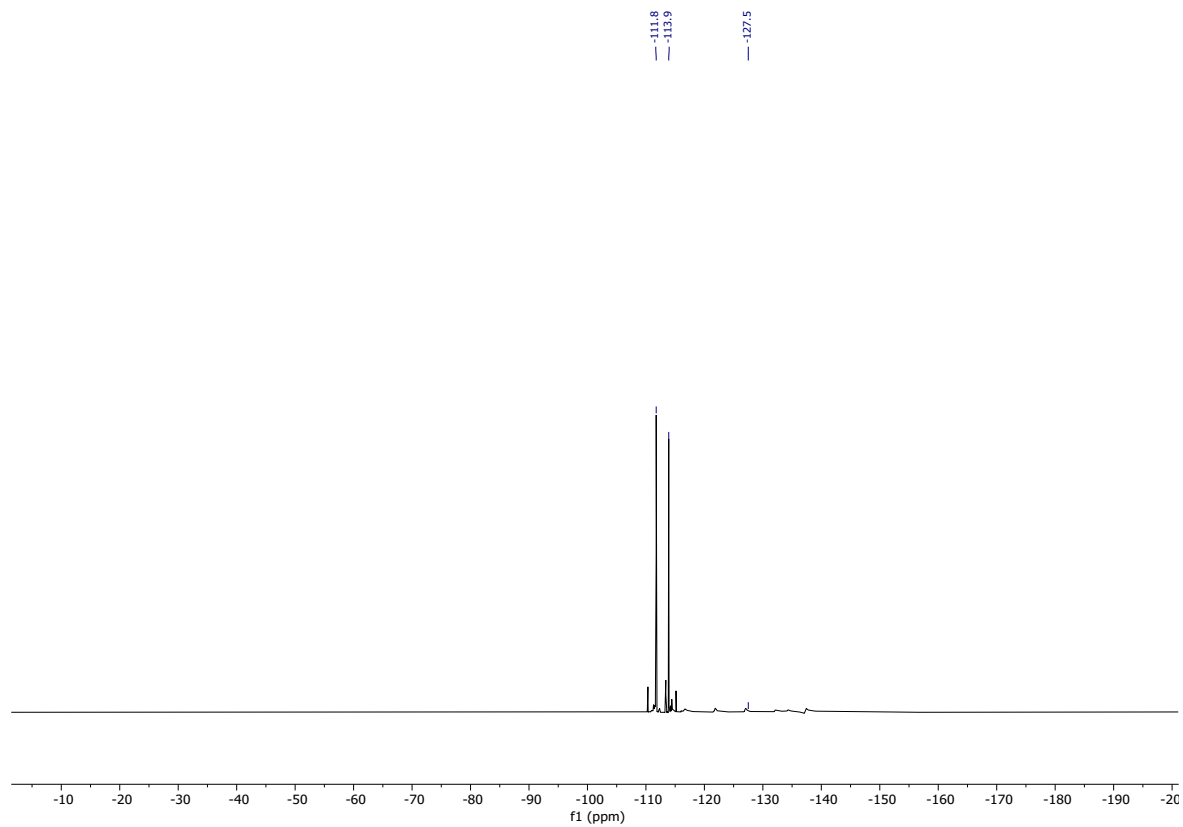

Figure S46.  $^{31}\text{P}\{^1\text{H}\}$  NMR (162 MHz,  $(\text{CD}_3)_2\text{CO}$ ) spectrum of complex **20**.



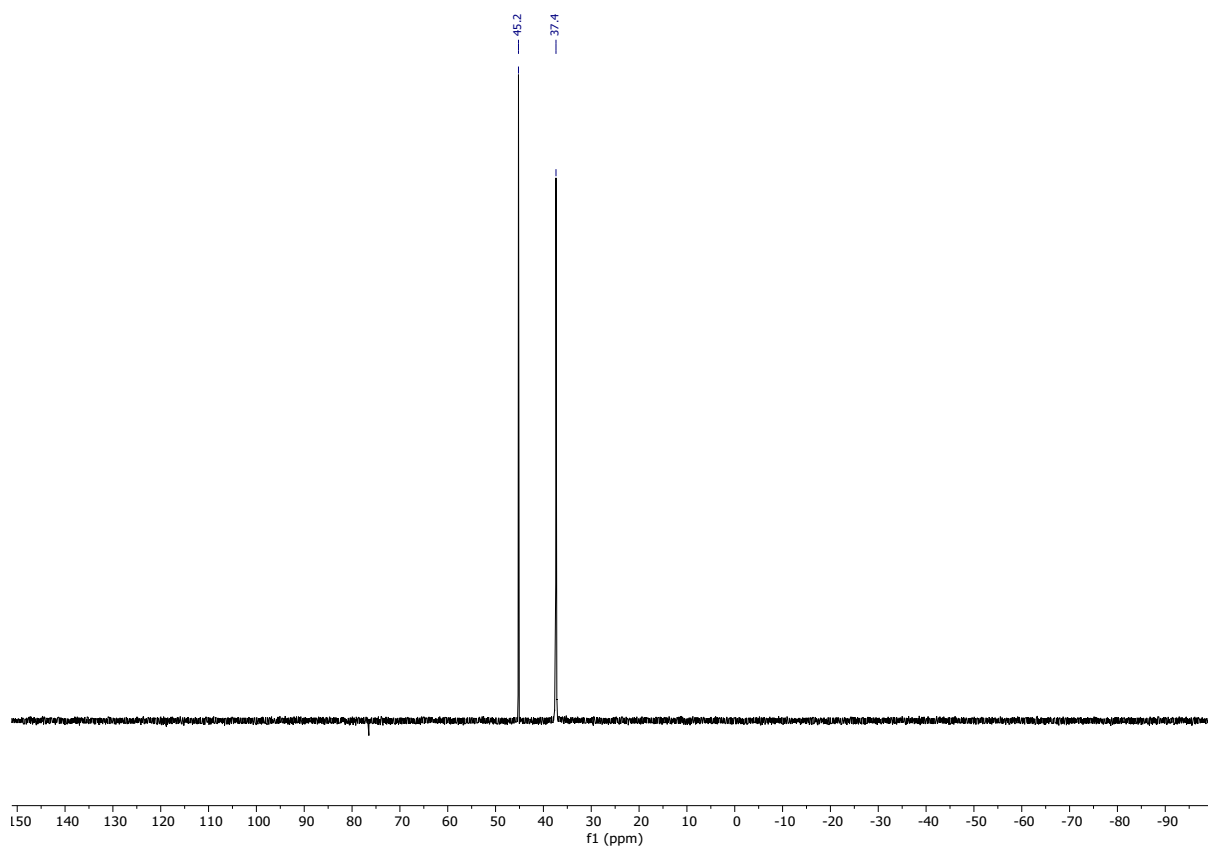

Figure S47.  $^1\text{H}$  NMR (400 MHz,  $(\text{CD}_3)_2\text{CO}$ ) spectrum of complex **21**.

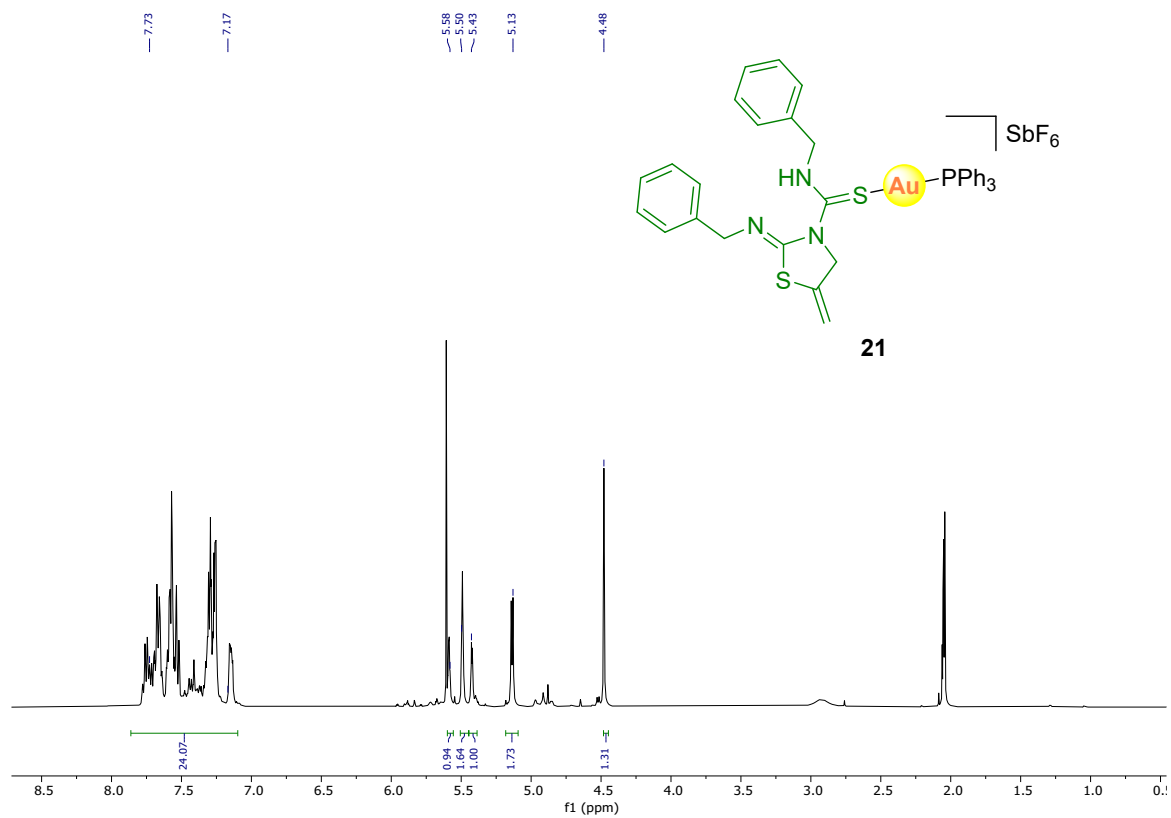

Figure S48.  $^{13}\text{C}\{^1\text{H}\}$  APT NMR (101 MHz,  $(\text{CD}_3)_2\text{CO}$ ) spectrum of complex **21**.

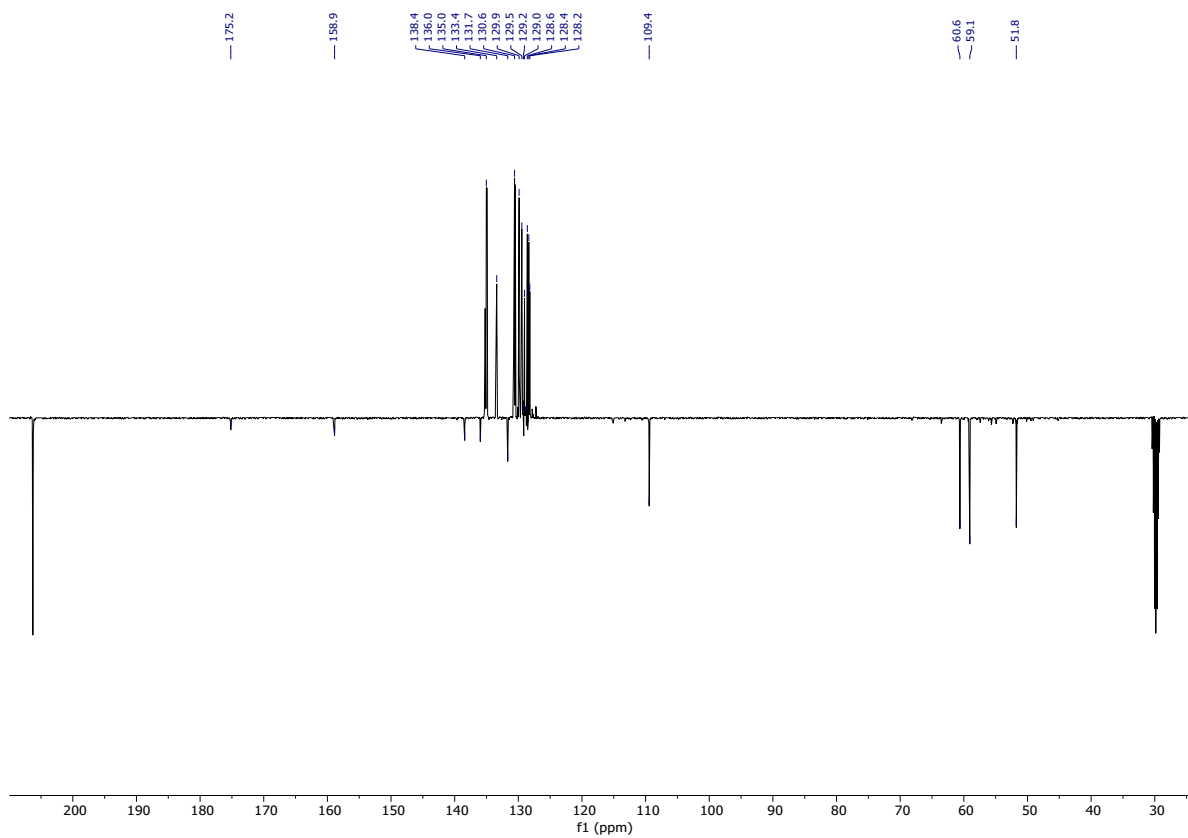

Figure S49.  $^{31}\text{P}\{^1\text{H}\}$  NMR (162 MHz,  $(\text{CD}_3)_2\text{CO}$ ) spectrum of complex **21**.

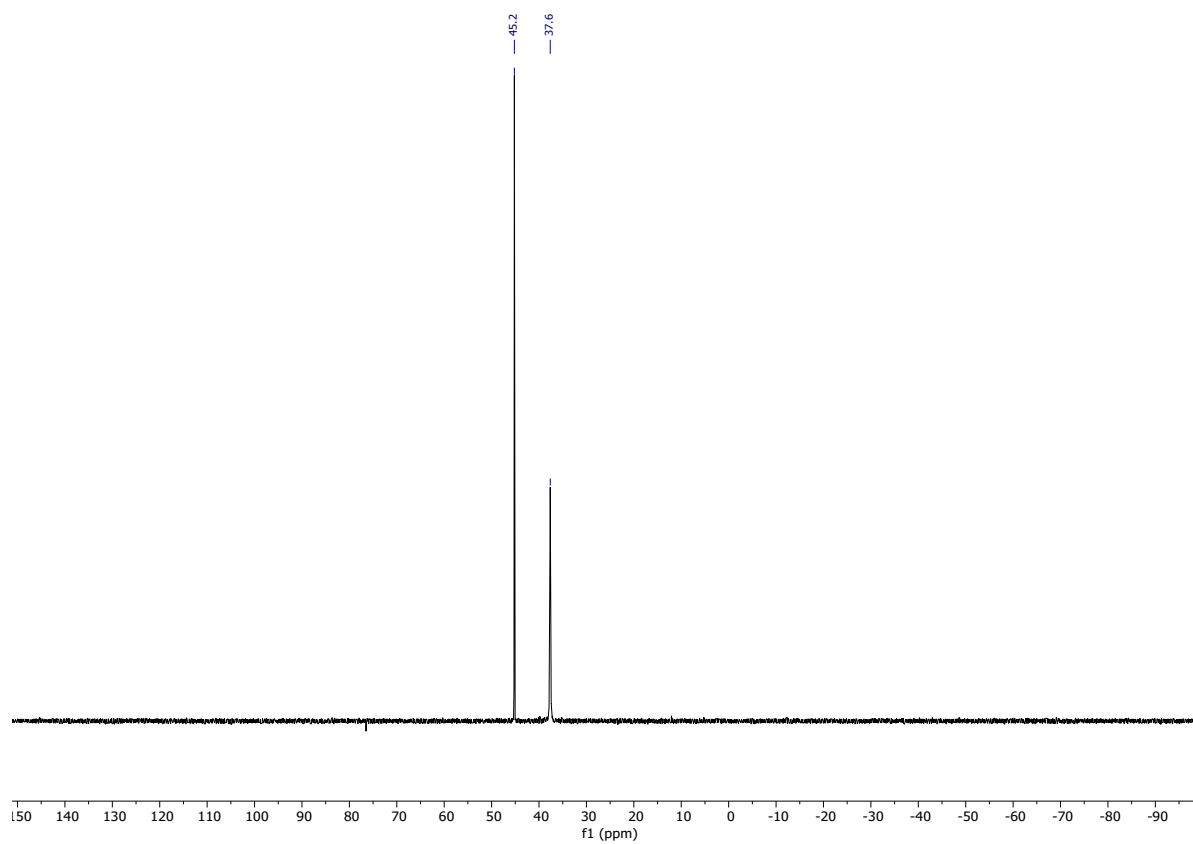

Figure S50.  $^1\text{H}$  NMR (400 MHz,  $(\text{CD}_3)_2\text{CO}$ ) spectrum of complex **22**.

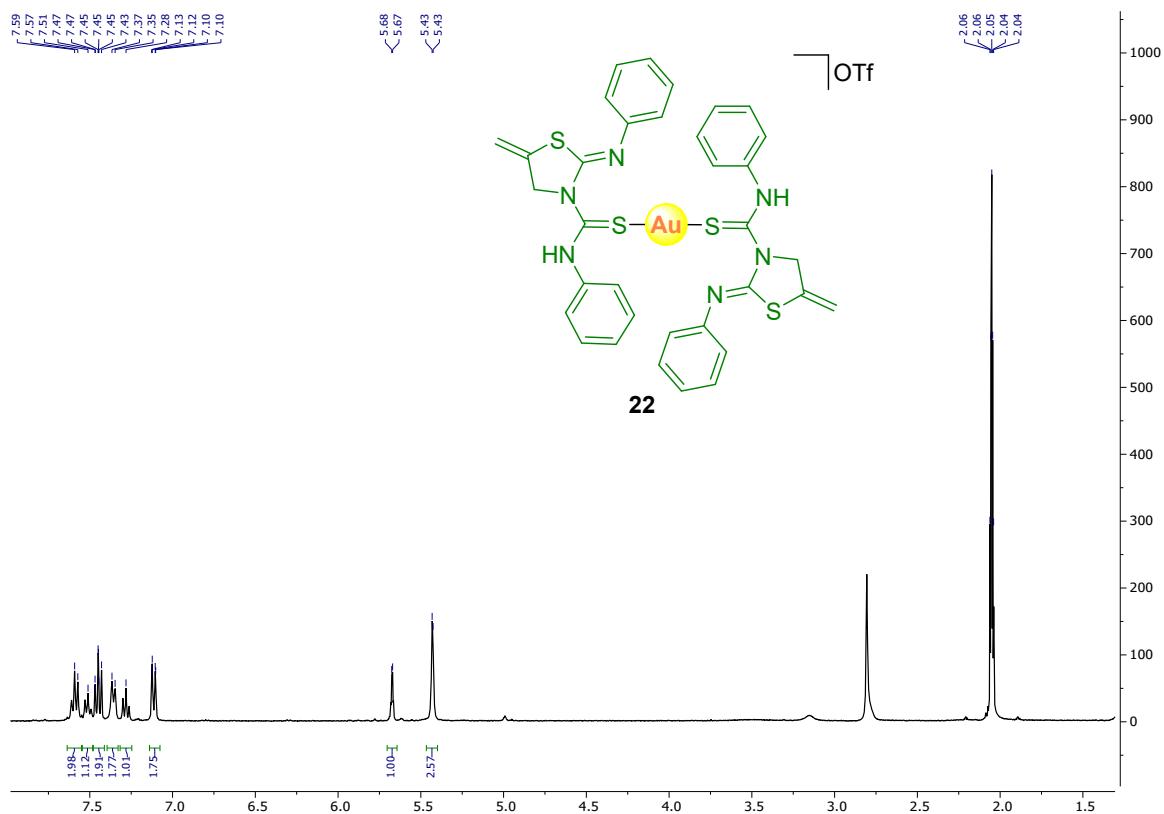

**Figure S51.**  $^{13}\text{C}\{^1\text{H}\}$  APT NMR (101 MHz,  $(\text{CD}_3)_2\text{CO}$ ) spectrum of complex **22**.

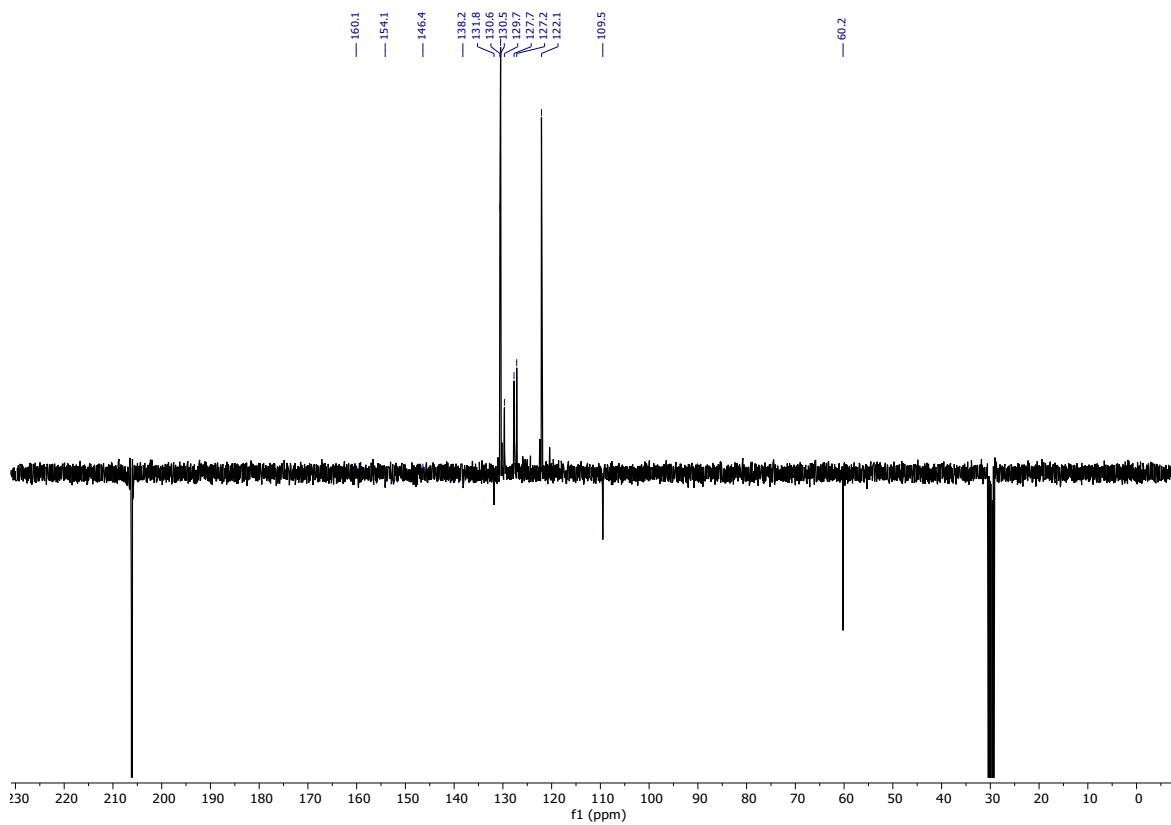

**Figure S52.**  $^{19}\text{F}\{^1\text{H}\}$  NMR (376 MHz,  $(\text{CD}_3)_2\text{CO}$ ) spectrum of complex **22**.

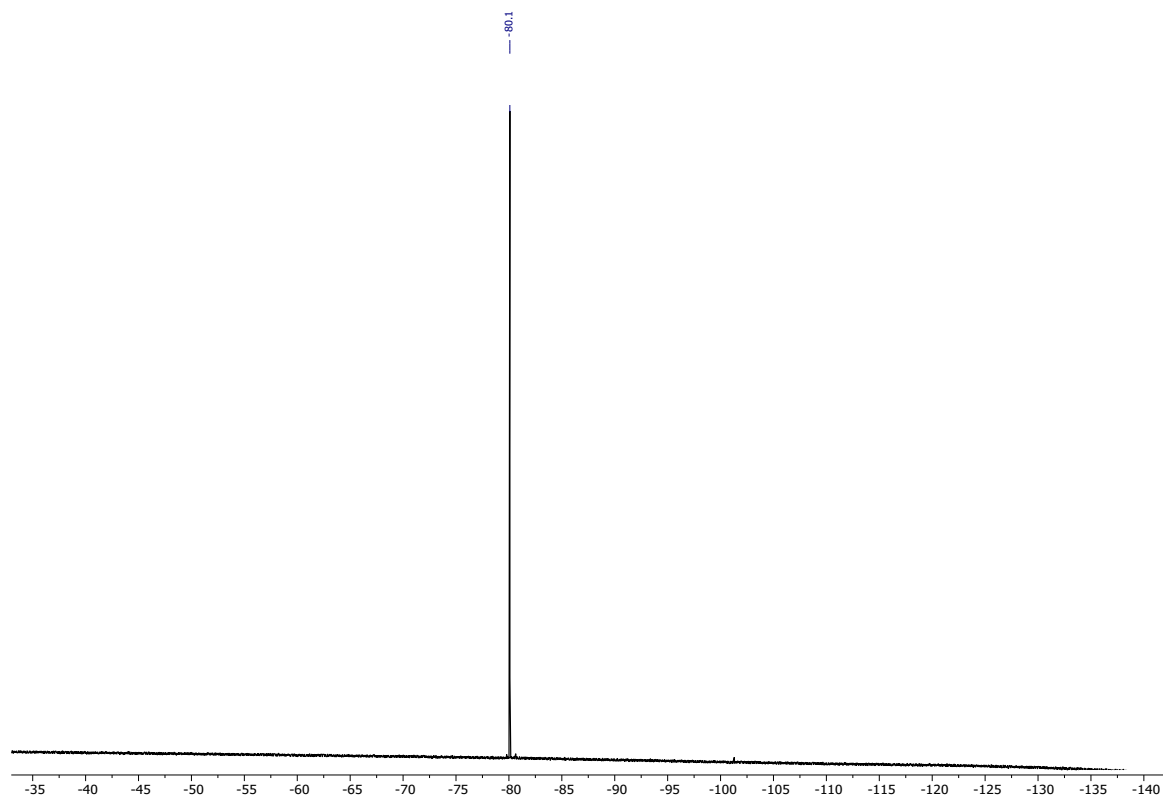

Figure S53.  $^1\text{H}$  NMR (400 MHz,  $(\text{CD}_3)_2\text{CO}$ ) spectrum of complex **23**.

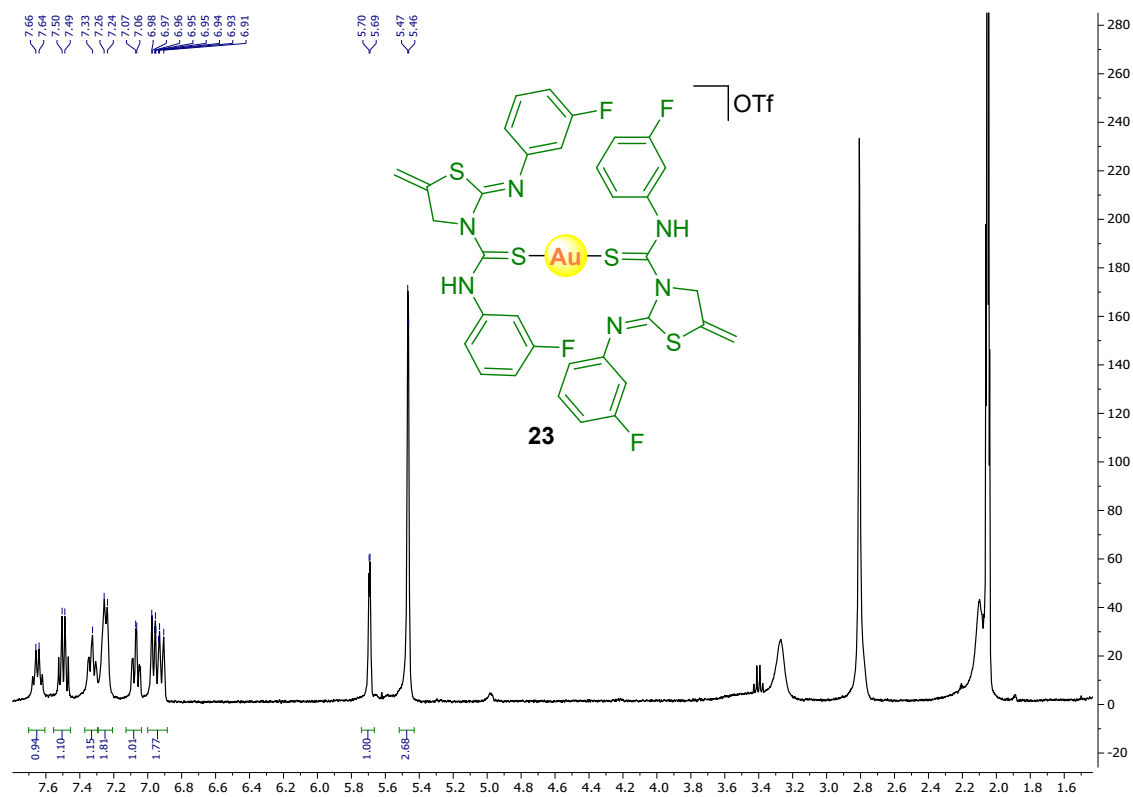

Figure S54.  $^{13}\text{C}\{^1\text{H}\}$  APT NMR (101 MHz,  $(\text{CD}_3)_2\text{CO}$ ) spectrum of complex **23**.

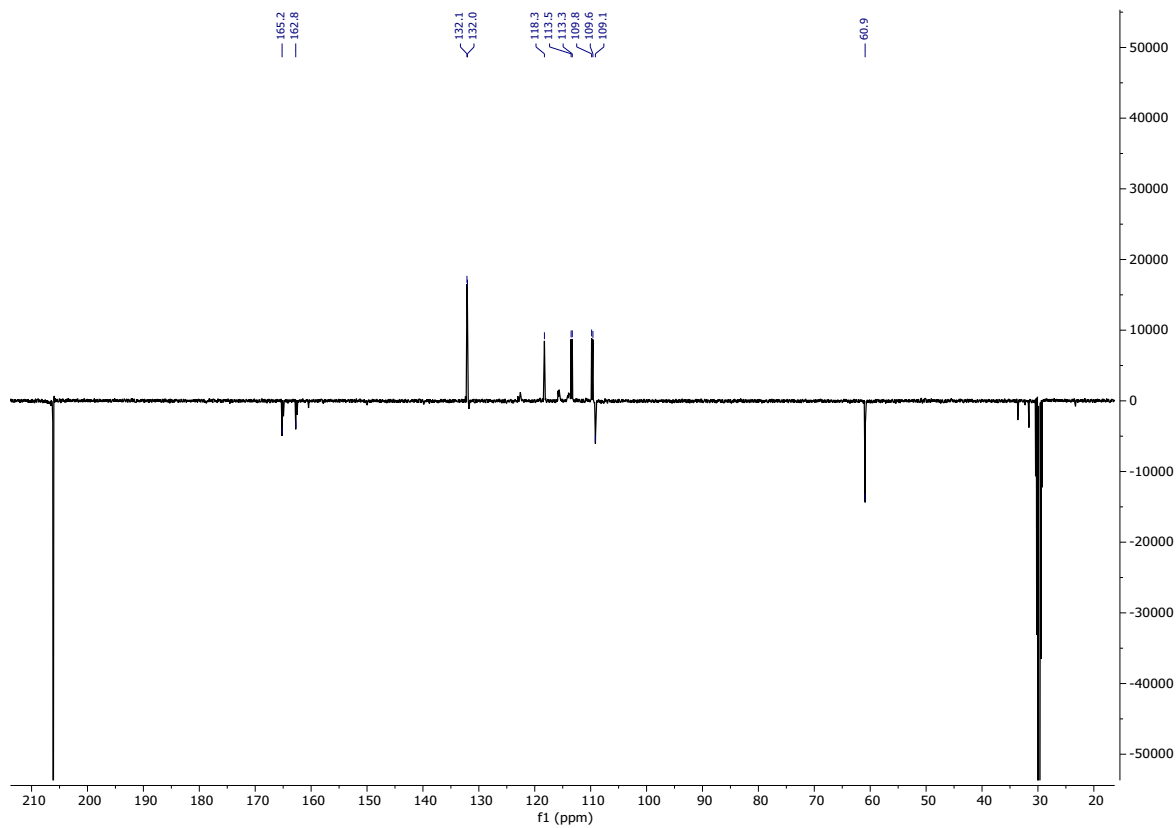

Figure S55.  $^{19}\text{F}\{^1\text{H}\}$  NMR (376 MHz,  $(\text{CD}_3)_2\text{CO}$ ) spectrum of complex **23**.

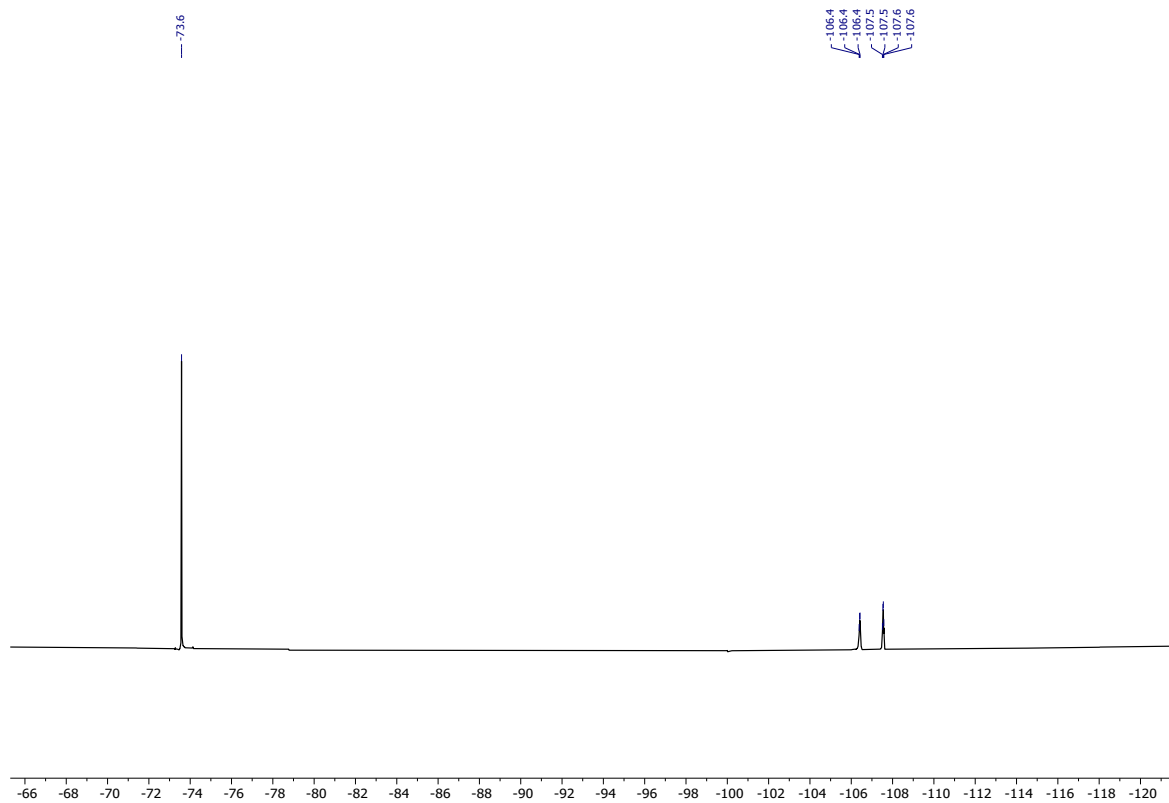

Figure S56.  $^1\text{H}$  NMR (400 MHz,  $(\text{CD}_3)_2\text{CO}$ ) spectrum of complex **24**.

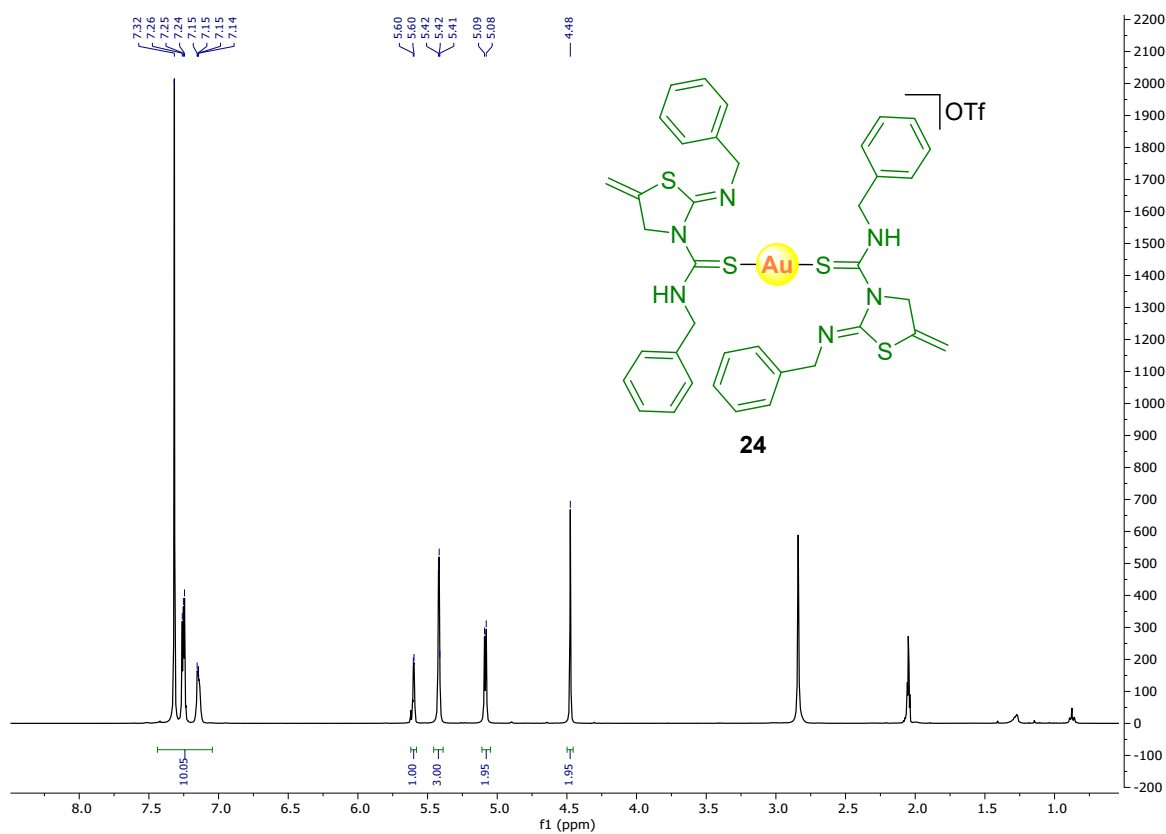

**Figure S57.**  $^{13}\text{C}\{^1\text{H}\}$  APT NMR (101 MHz,  $(\text{CD}_3)_2\text{CO}$ ) spectrum of complex **24**.

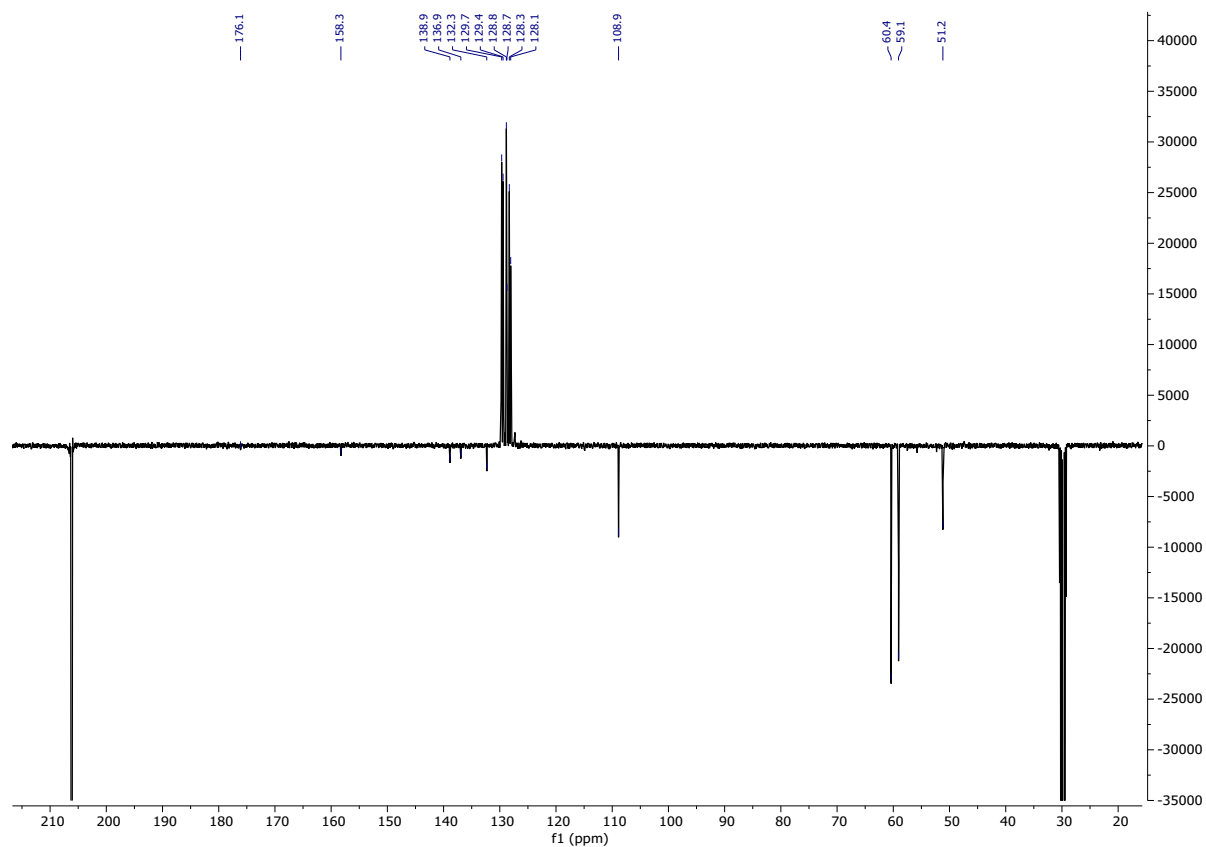

Figure S58.  $^{19}\text{F}\{^1\text{H}\}$  NMR (376 MHz,  $(\text{CD}_3)_2\text{CO}$ ) spectrum of complex 24.

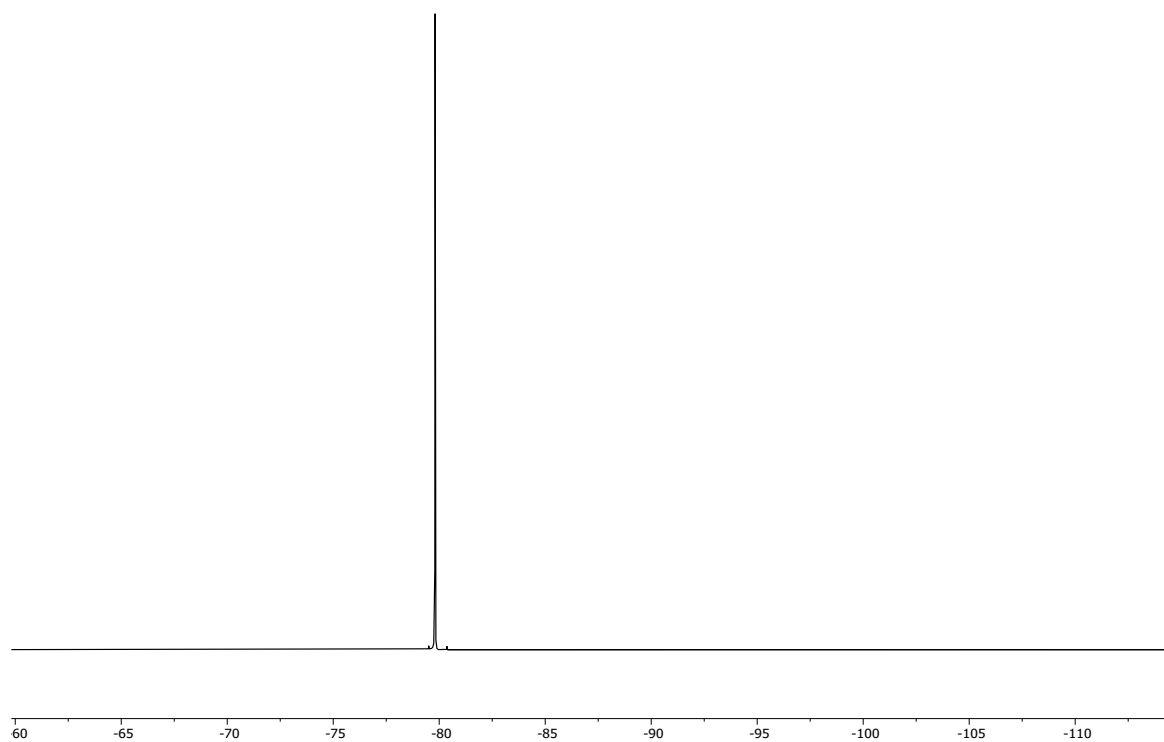

Figure S59.  $^1\text{H}$  NMR (400 MHz,  $(\text{CD}_3)_2\text{CO}$ ) spectrum of complex 25.

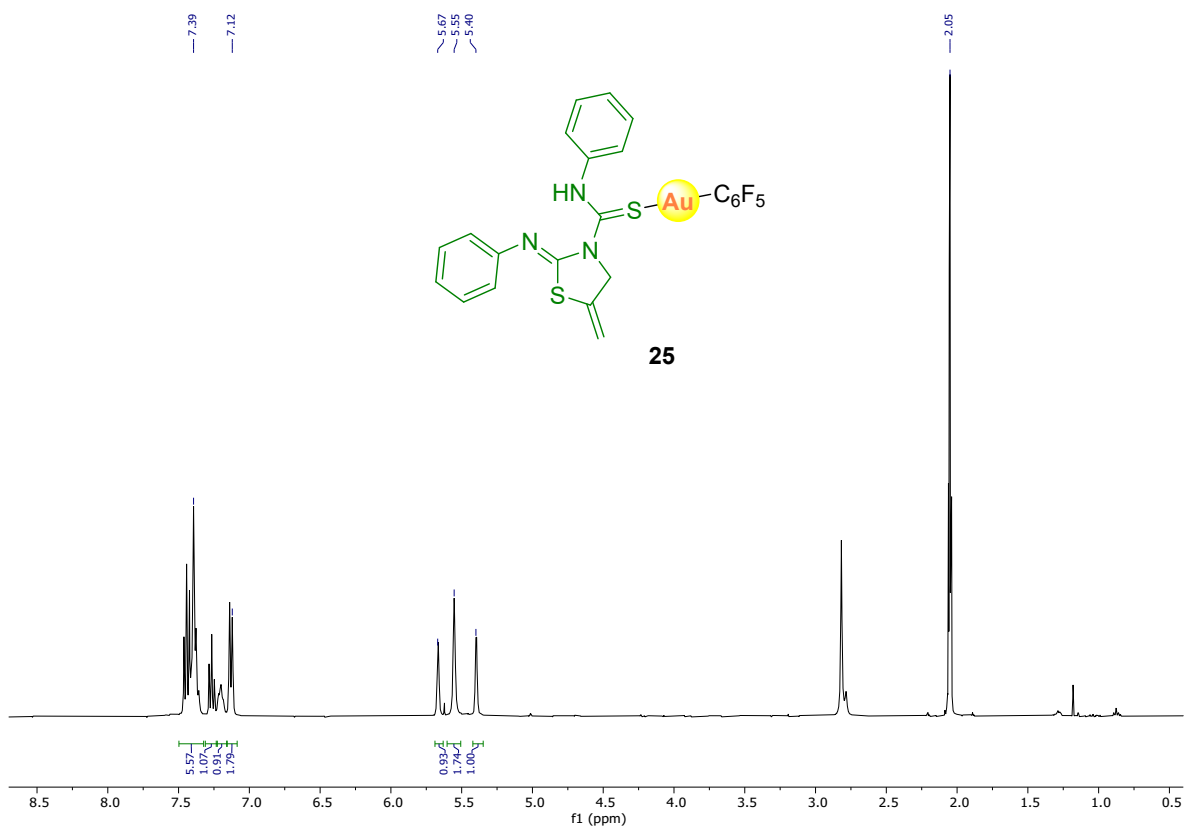

**Figure S60.**  $^{13}\text{C}\{^1\text{H}\}$  APT NMR (101 MHz,  $(\text{CD}_3)_2\text{CO}$ ) spectrum of complex **25**.

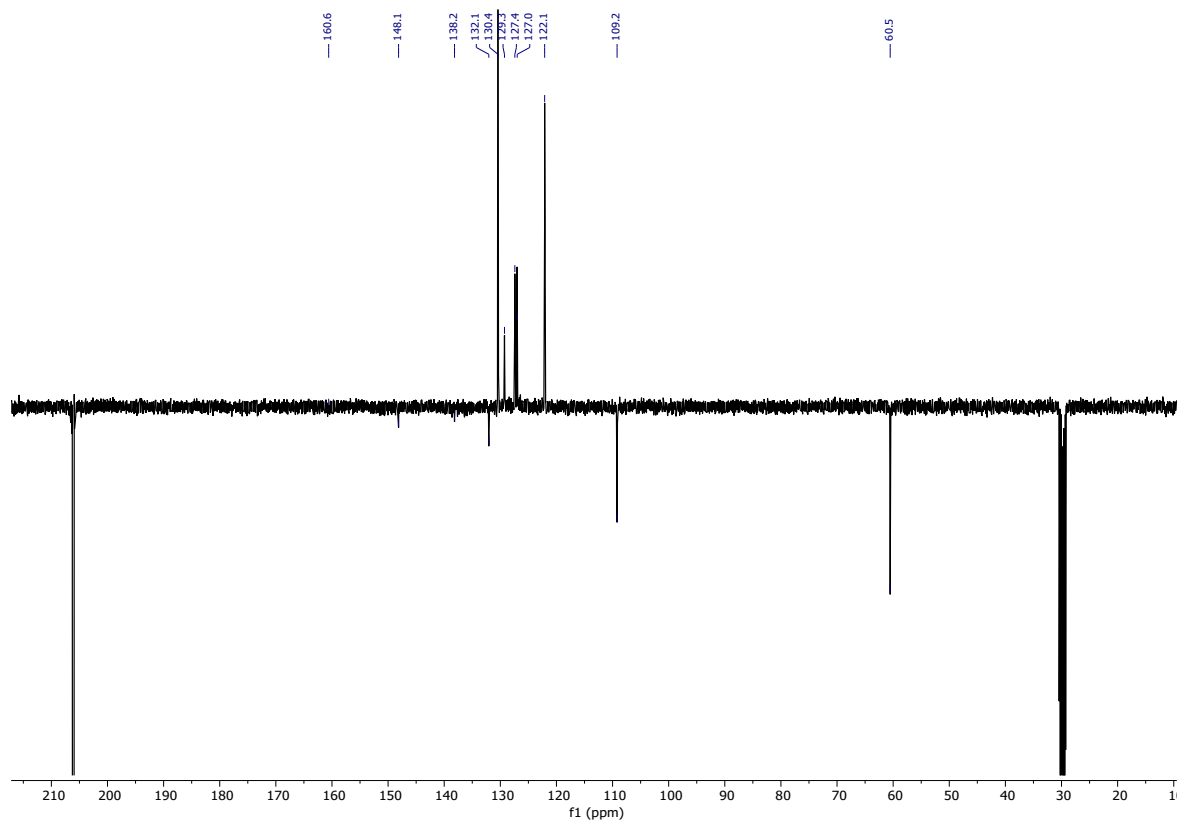

**Figure S61.**  $^{19}\text{F}$  NMR (ppm) (376 MHz,  $(\text{CD}_3)_2\text{CO}$ ) spectrum of complex **25**.



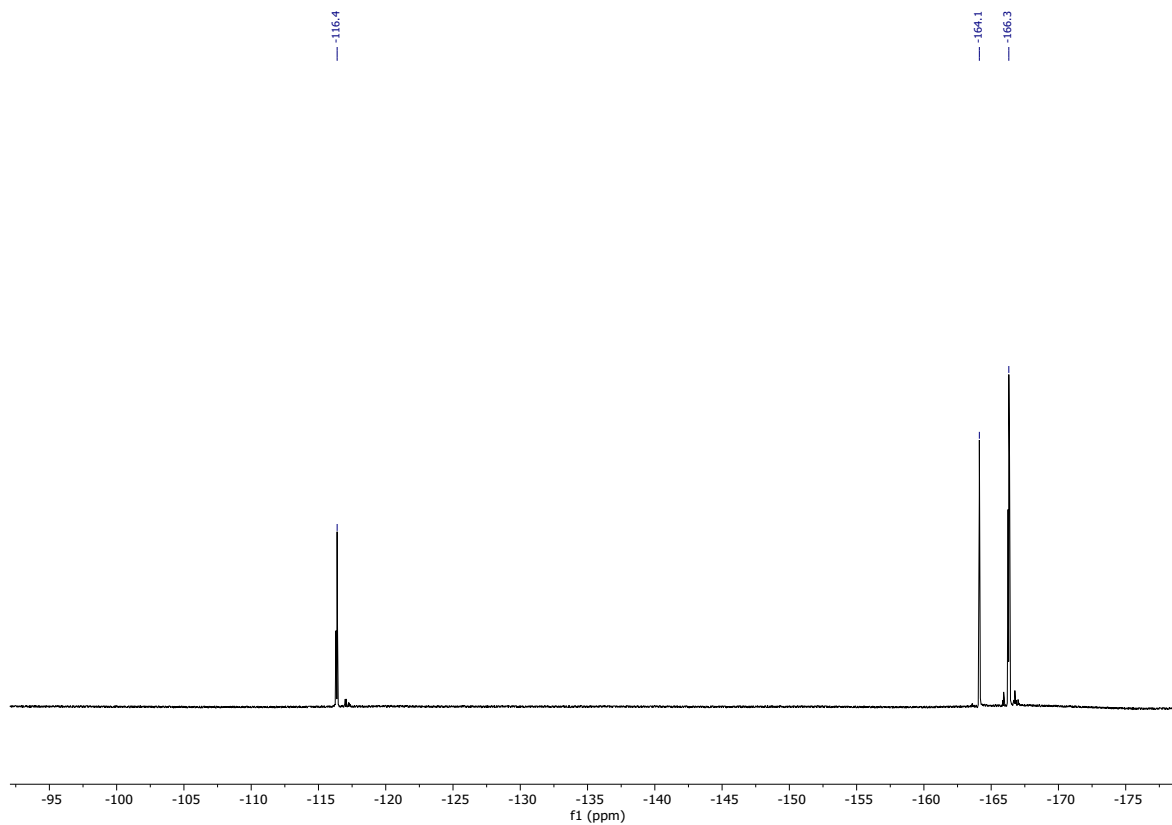

Figure S62.  $^1\text{H}$  NMR (400 MHz,  $(\text{CD}_3)_2\text{CO}$ ) spectrum of complex **26**.

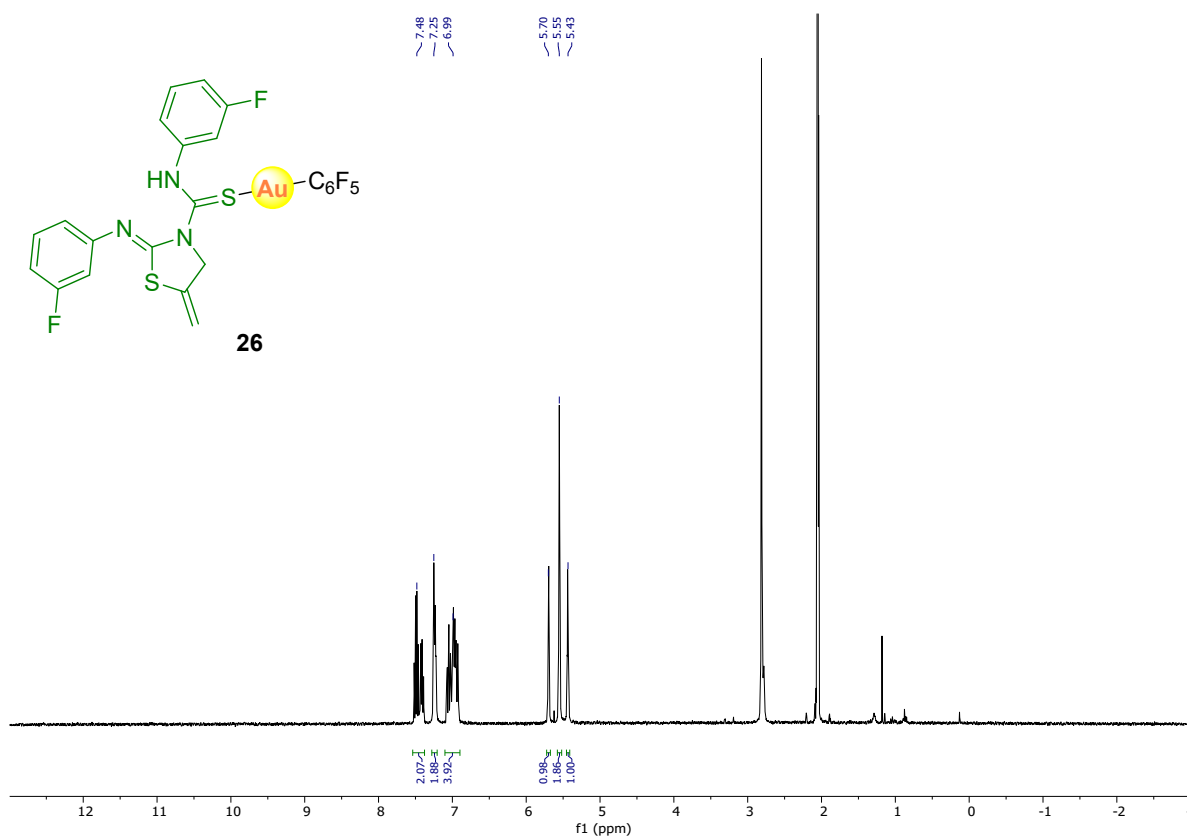

Figure S63.  $^{13}\text{C}\{^1\text{H}\}$  APT NMR (101 MHz,  $(\text{CD}_3)_2\text{CO}$ ) spectrum of complex **26**.

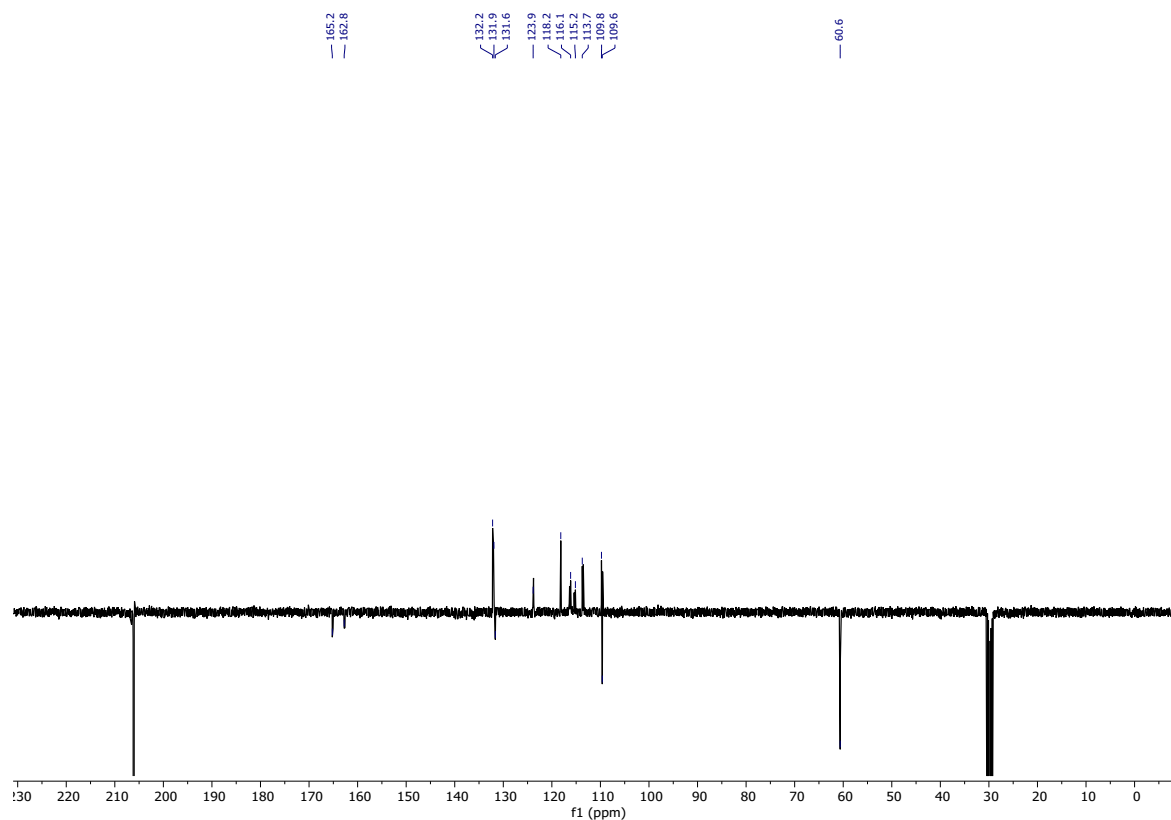

Figure S64.  $^{19}\text{F}$  NMR (376 MHz,  $(\text{CD}_3)_2\text{CO}$ ) spectrum of complex **26**.

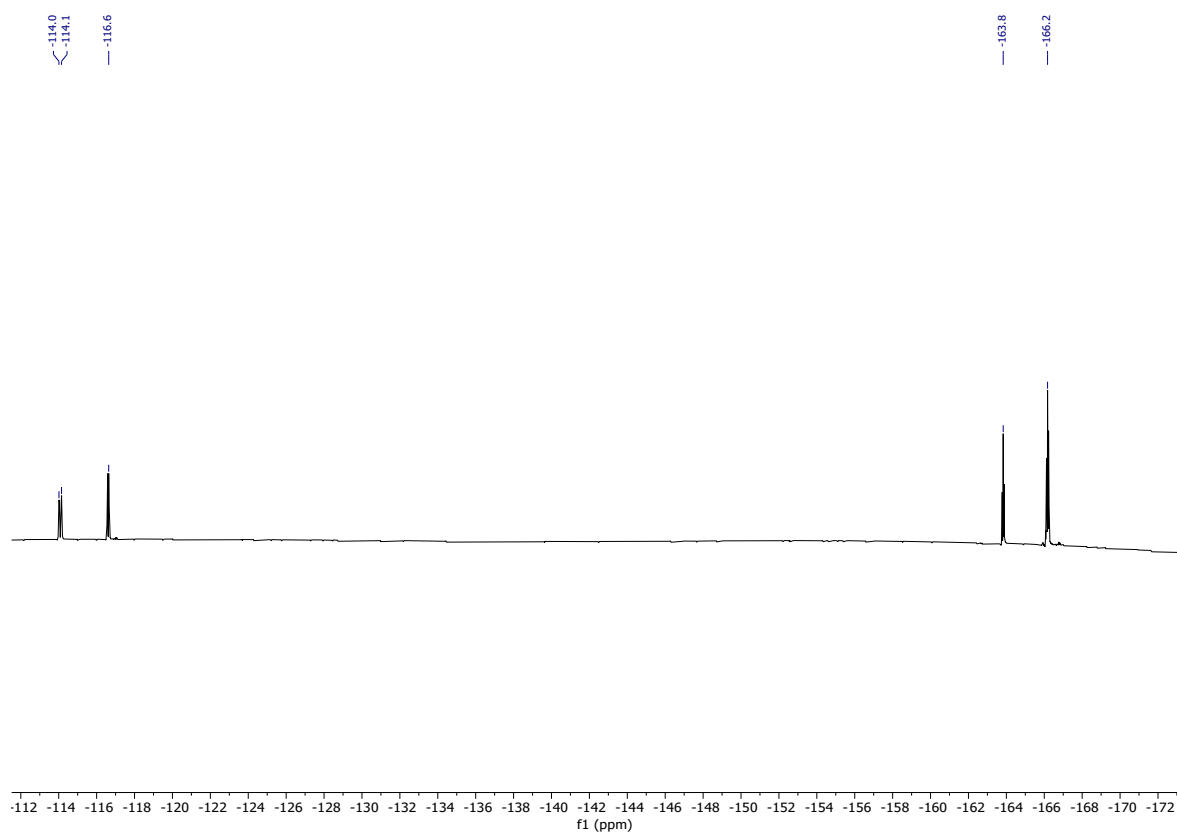

Figure S65.  $^1\text{H}$  NMR (400 MHz,  $(\text{CD}_3)_2\text{CO}$ ) spectrum of complex **27**.

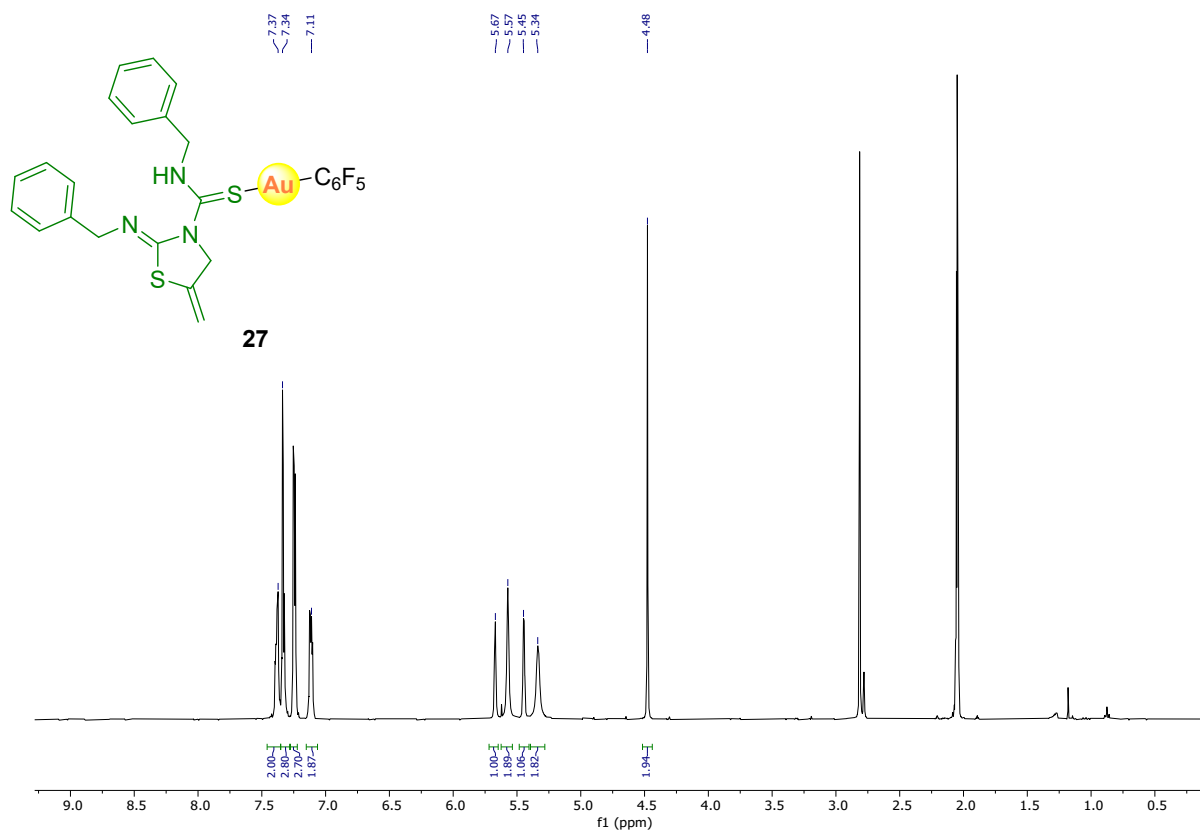

**Figure S66.** <sup>13</sup>C{<sup>1</sup>H} APT NMR (101 MHz, (CD<sub>3</sub>)<sub>2</sub>CO) spectrum of complex **27**.

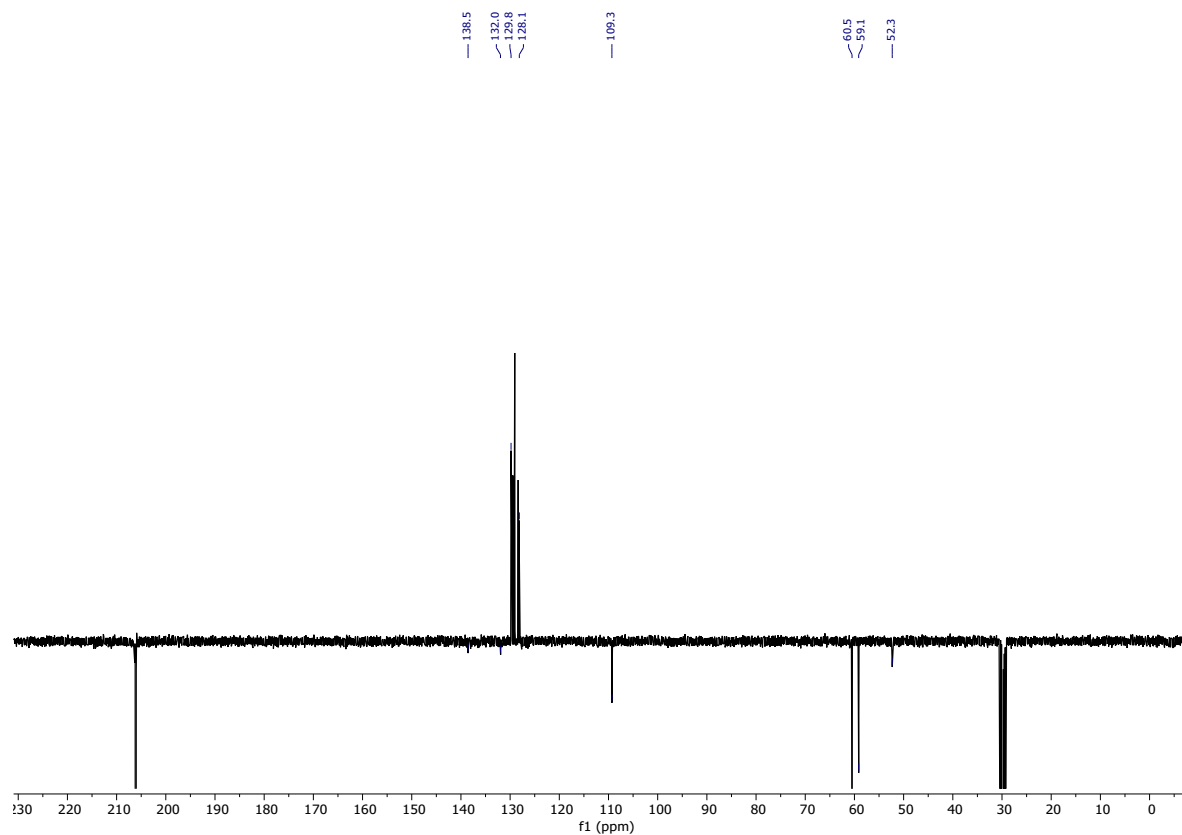

**Figure S67.** <sup>19</sup>F NMR (376 MHz, (CD<sub>3</sub>)<sub>2</sub>CO) spectrum of complex **27**.

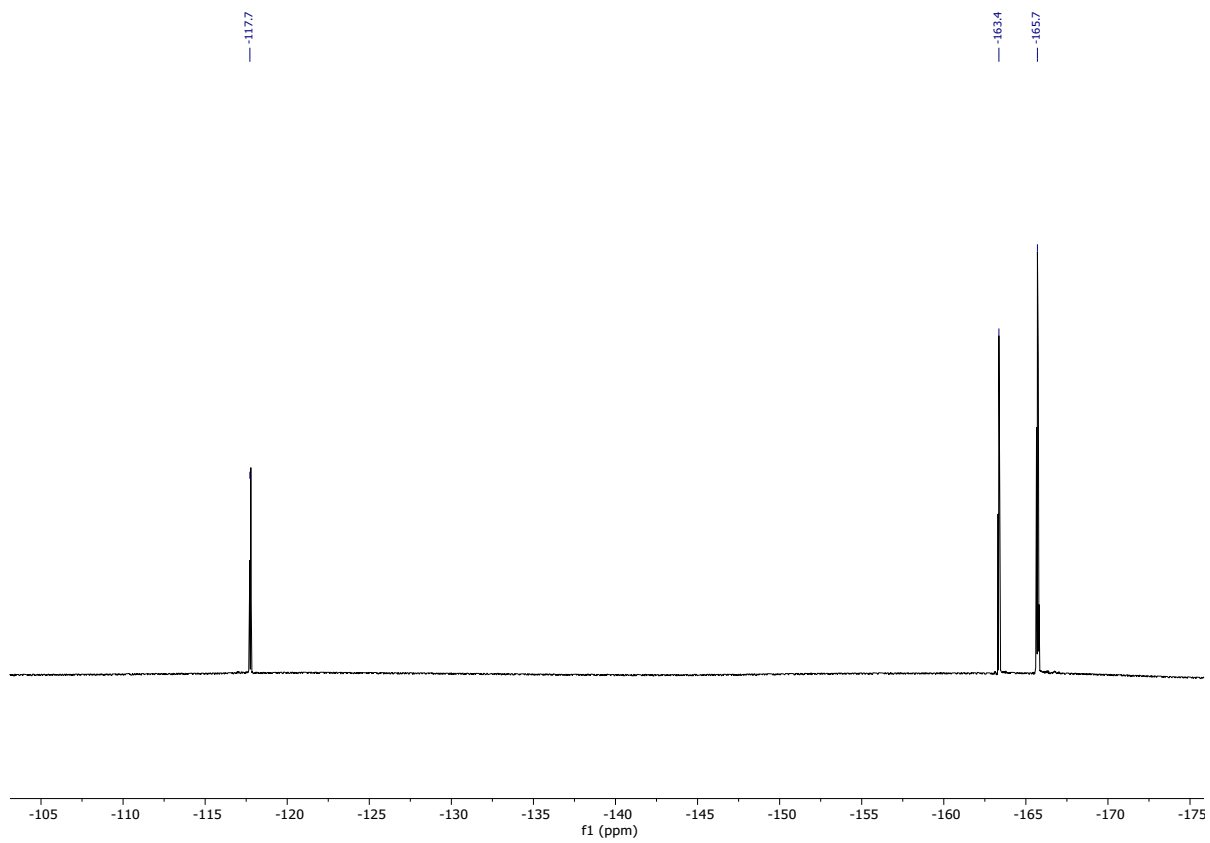

Supplement: d3dt00079f1.pdf [file d3dt00079f1.pdf]
